# Supplementary material for: Synthesis of photo- and ionochromic N-acylated 2-(aminomethylene)benzo[ b ]thiophene-3(2 Н )-ones with a terminal phenanthroline group
Source: publisher site journal article supplement (doi:10.3762/bjoc.20.47), 2024-03-11

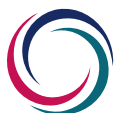

## Supporting Information

for

### Synthesis of photo- and ionochromic N-acylated 2-(aminomethylene)benzo[*b*]thiophene-3(2*H*)-ones with a terminal phenanthroline group

Vladimir P. Rybalkin, Sofiya Yu. Zmeeva, Lidiya L. Popova, Irina V. Dubonosova,  
Olga Yu. Karlutova, Oleg P. Demidov, Alexander D. Dubonosov and Vladimir A. Bren

*Beilstein J. Org. Chem.* **2024**, *20*, 552–560. [doi:10.3762/bjoc.20.47](https://doi.org/10.3762/bjoc.20.47)

### X-ray analysis data of 3b

**Table S1:** Crystal data and structure refinement for compound **3b**.

|                                                              |                                                                                            |
|--------------------------------------------------------------|--------------------------------------------------------------------------------------------|
| CCDC Number                                                  | 2299603                                                                                    |
| Empirical formula                                            | C <sub>24</sub> H <sub>17</sub> N <sub>3</sub> O <sub>2</sub> S                            |
| Formula weight                                               | 411.46                                                                                     |
| Temperature/K                                                | 293(2)                                                                                     |
| Crystal system                                               | triclinic                                                                                  |
| Space group                                                  | <i>P</i> -1                                                                                |
| <i>a</i> , Å                                                 | 7.43030(10)                                                                                |
| <i>b</i> , Å                                                 | 9.6398(2)                                                                                  |
| <i>c</i> , Å                                                 | 14.3294(3)                                                                                 |
| $\alpha$ , °                                                 | 75.731(2)                                                                                  |
| $\beta$ , °                                                  | 82.686(2)                                                                                  |
| $\gamma$ , °                                                 | 78.664(2)                                                                                  |
| <i>V</i> , Å <sup>3</sup>                                    | 971.93(3)                                                                                  |
| <i>Z</i>                                                     | 2                                                                                          |
| $\rho_{\text{calc}}$ , cm <sup>3</sup>                       | 1.406                                                                                      |
| $\mu$ , mm <sup>-1</sup>                                     | 1.701                                                                                      |
| F(000)                                                       | 428.0                                                                                      |
| Crystal size, mm                                             | 0.361 × 0.281 × 0.1                                                                        |
| Radiation                                                    | Cu K $\alpha$ ( $\lambda$ = 1.54184)                                                       |
| 2 $\theta$ range for data collection, °                      | 9.61 to 152.768                                                                            |
| Index ranges                                                 | -9 ≤ <i>h</i> ≤ 9, -11 ≤ <i>k</i> ≤ 12, -17 ≤ <i>l</i> ≤ 18                                |
| Reflections collected                                        | 17777                                                                                      |
| Independent reflections                                      | 4053 [ <i>R</i> <sub>int</sub> = 0.0201, <i>R</i> <sub><math>\sigma</math></sub> = 0.0153] |
| Data/restraints/parameters                                   | 4053/0/272                                                                                 |
| Goodness-of-fit on F <sup>2</sup>                            | 1.054                                                                                      |
| Final <i>R</i> indices [ <i>I</i> ≥ 2 $\sigma$ ( <i>I</i> )] | <i>R</i> <sub>1</sub> = 0.0307, <i>wR</i> <sub>2</sub> = 0.0808                            |
| Final <i>R</i> indices [all data]                            | <i>R</i> <sub>1</sub> = 0.0315, <i>wR</i> <sub>2</sub> = 0.0813                            |
| Largest diff. peak and hole, e·Å <sup>-3</sup>               | 0.23/-0.35                                                                                 |

**Table S2:** Bond lengths for compound **3b**.

| Atom | Atom | Length/Å   | Atom | Atom | Length/Å   |
|------|------|------------|------|------|------------|
| S1   | C8   | 1.7409(12) | C15  | C14  | 1.3606(16) |
| S1   | C1   | 1.7401(11) | C15  | C16  | 1.4292(15) |
| O1   | C2   | 1.3901(13) | C22  | C23  | 1.4972(16) |
| O1   | C22  | 1.3820(13) | C9   | C1   | 1.4491(15) |
| O2   | C22  | 1.2001(14) | C20  | C16  | 1.4147(15) |
| N3   | C14  | 1.4105(14) | C3   | C8   | 1.4072(17) |
| N3   | C9   | 1.2827(15) | C3   | C4   | 1.4028(16) |
| N2   | C20  | 1.3595(14) | C16  | C17  | 1.4086(15) |
| N2   | C19  | 1.3279(15) | C12  | C11  | 1.3737(17) |
| N1   | C21  | 1.3607(15) | C17  | C18  | 1.3687(16) |
| N1   | C10  | 1.3288(15) | C18  | C19  | 1.4046(17) |
| C13  | C21  | 1.4161(15) | C8   | C7   | 1.3992(16) |
| C13  | C14  | 1.4466(15) | C10  | C11  | 1.4016(17) |
| C13  | C12  | 1.4086(15) | C7   | C6   | 1.3833(18) |
| C2   | C3   | 1.4284(15) | C23  | C24  | 1.5224(17) |
| C2   | C1   | 1.3605(16) | C4   | C5   | 1.3811(17) |
| C21  | C20  | 1.4562(15) | C6   | C5   | 1.4003(19) |

**Table S3:** Bond angles for compound **3b**.

| Atom | Atom | Atom | Angle/°    | Atom | Atom | Atom | Angle/°    |
|------|------|------|------------|------|------|------|------------|
| C1   | S1   | C8   | 91.11(6)   | C16  | C20  | C21  | 118.29(10) |
| C22  | O1   | C2   | 114.92(8)  | C8   | C3   | C2   | 110.49(10) |
| C9   | N3   | C14  | 117.80(10) | C4   | C3   | C2   | 129.47(11) |
| C19  | N2   | C20  | 117.38(10) | C4   | C3   | C8   | 120.03(11) |
| C10  | N1   | C21  | 117.48(10) | C20  | C16  | C15  | 120.82(10) |
| C21  | C13  | C14  | 120.18(10) | C17  | C16  | C15  | 121.33(10) |
| C12  | C13  | C21  | 118.09(10) | C17  | C16  | C20  | 117.84(10) |
| C12  | C13  | C14  | 121.71(10) | C11  | C12  | C13  | 119.50(10) |
| O1   | C2   | C3   | 123.91(10) | C18  | C17  | C16  | 119.58(10) |
| C1   | C2   | O1   | 121.64(10) | C17  | C18  | C19  | 118.33(10) |
| C1   | C2   | C3   | 114.44(10) | C3   | C8   | S1   | 112.08(8)  |

|     |     |     |            |     |     |     |            |
|-----|-----|-----|------------|-----|-----|-----|------------|
| N1  | C21 | C13 | 122.20(10) | C7  | C8  | S1  | 126.93(10) |
| N1  | C21 | C20 | 118.31(10) | C7  | C8  | C3  | 120.99(11) |
| C13 | C21 | C20 | 119.47(10) | C2  | C1  | S1  | 111.83(8)  |
| C14 | C15 | C16 | 121.22(10) | C2  | C1  | C9  | 126.95(10) |
| N3  | C14 | C13 | 117.43(10) | C9  | C1  | S1  | 121.21(9)  |
| C15 | C14 | N3  | 122.44(10) | N2  | C19 | C18 | 124.33(10) |
| C15 | C14 | C13 | 119.95(10) | N1  | C10 | C11 | 124.56(11) |
| O1  | C22 | C23 | 111.09(9)  | C6  | C7  | C8  | 117.89(12) |
| O2  | C22 | O1  | 121.99(10) | C22 | C23 | C24 | 110.62(10) |
| O2  | C22 | C23 | 126.91(10) | C12 | C11 | C10 | 118.15(11) |
| N3  | C9  | C1  | 120.05(10) | C5  | C4  | C3  | 118.80(12) |
| N2  | C20 | C21 | 119.19(10) | C7  | C6  | C5  | 121.63(11) |
| N2  | C20 | C16 | 122.51(10) | C4  | C5  | C6  | 120.65(11) |

**Table S4:** Torsion angles for compound **3b**.

| A   | B   | C   | D   | Angle/°     | A   | B   | C   | D   | Angle/°     |
|-----|-----|-----|-----|-------------|-----|-----|-----|-----|-------------|
| S1  | C8  | C7  | C6  | 179.44(9)   | C14 | C15 | C16 | C17 | -179.41(10) |
| O1  | C2  | C3  | C8  | -179.17(10) | C22 | O1  | C2  | C3  | -75.26(13)  |
| O1  | C2  | C3  | C4  | 1.65(19)    | C22 | O1  | C2  | C1  | 105.89(12)  |
| O1  | C2  | C1  | S1  | 177.69(8)   | C9  | N3  | C14 | C13 | -139.08(10) |
| O1  | C2  | C1  | C9  | -1.18(17)   | C9  | N3  | C14 | C15 | 45.83(15)   |
| O1  | C22 | C23 | C24 | 170.73(9)   | C20 | N2  | C19 | C18 | -0.60(17)   |
| O2  | C22 | C23 | C24 | -10.02(17)  | C20 | C16 | C17 | C18 | -0.96(16)   |
| N3  | C9  | C1  | S1  | 10.30(15)   | C3  | C2  | C1  | S1  | -1.26(13)   |
| N3  | C9  | C1  | C2  | -170.92(11) | C3  | C2  | C1  | C9  | 179.87(10)  |
| N2  | C20 | C16 | C15 | -177.59(10) | C3  | C8  | C7  | C6  | -1.03(17)   |
| N2  | C20 | C16 | C17 | 1.57(16)    | C3  | C4  | C5  | C6  | -0.36(18)   |
| N1  | C21 | C20 | N2  | -4.53(15)   | C16 | C15 | C14 | N3  | 173.51(10)  |
| N1  | C21 | C20 | C16 | 175.49(10)  | C16 | C15 | C14 | C13 | -1.46(16)   |
| N1  | C10 | C11 | C12 | 1.50(19)    | C16 | C17 | C18 | C19 | -0.31(17)   |
| C13 | C21 | C20 | N2  | 177.20(10)  | C12 | C13 | C21 | N1  | 1.30(16)    |
| C13 | C21 | C20 | C16 | -2.78(15)   | C12 | C13 | C21 | C20 | 179.51(10)  |
| C13 | C12 | C11 | C10 | -0.33(17)   | C12 | C13 | C14 | N3  | 7.48(15)    |
| C2  | O1  | C22 | O2  | 6.67(14)    | C12 | C13 | C14 | C15 | -177.31(10) |

|     |     |     |     |             |     |     |     |     |             |
|-----|-----|-----|-----|-------------|-----|-----|-----|-----|-------------|
| C2  | O1  | C22 | C23 | -174.04(9)  | C17 | C18 | C19 | N2  | 1.17(18)    |
| C2  | C3  | C8  | S1  | 1.64(12)    | C8  | S1  | C1  | C2  | 1.84(9)     |
| C2  | C3  | C8  | C7  | -177.96(10) | C8  | S1  | C1  | C9  | -179.21(9)  |
| C2  | C3  | C4  | C5  | 178.52(11)  | C8  | C3  | C4  | C5  | -0.59(17)   |
| C21 | N1  | C10 | C11 | -1.20(18)   | C8  | C7  | C6  | C5  | 0.07(18)    |
| C21 | C13 | C14 | N3  | -174.20(9)  | C1  | S1  | C8  | C3  | -1.99(9)    |
| C21 | C13 | C14 | C15 | 1.01(16)    | C1  | S1  | C8  | C7  | 177.58(11)  |
| C21 | C13 | C12 | C11 | -0.97(16)   | C1  | C2  | C3  | C8  | -0.24(14)   |
| C21 | C20 | C16 | C15 | 2.39(15)    | C1  | C2  | C3  | C4  | -179.43(11) |
| C21 | C20 | C16 | C17 | -178.45(10) | C19 | N2  | C20 | C21 | 179.22(10)  |
| C15 | C16 | C17 | C18 | 178.20(10)  | C19 | N2  | C20 | C16 | -0.80(16)   |
| C14 | N3  | C9  | C1  | -172.99(9)  | C10 | N1  | C21 | C13 | -0.24(16)   |
| C14 | C13 | C21 | N1  | -177.08(10) | C10 | N1  | C21 | C20 | -178.47(10) |
| C14 | C13 | C21 | C20 | 1.13(15)    | C7  | C6  | C5  | C4  | 0.64(19)    |
| C14 | C13 | C12 | C11 | 177.39(10)  | C4  | C3  | C8  | S1  | -179.09(9)  |
| C14 | C15 | C16 | C20 | -0.28(16)   | C4  | C3  | C8  | C7  | 1.31(17)    |

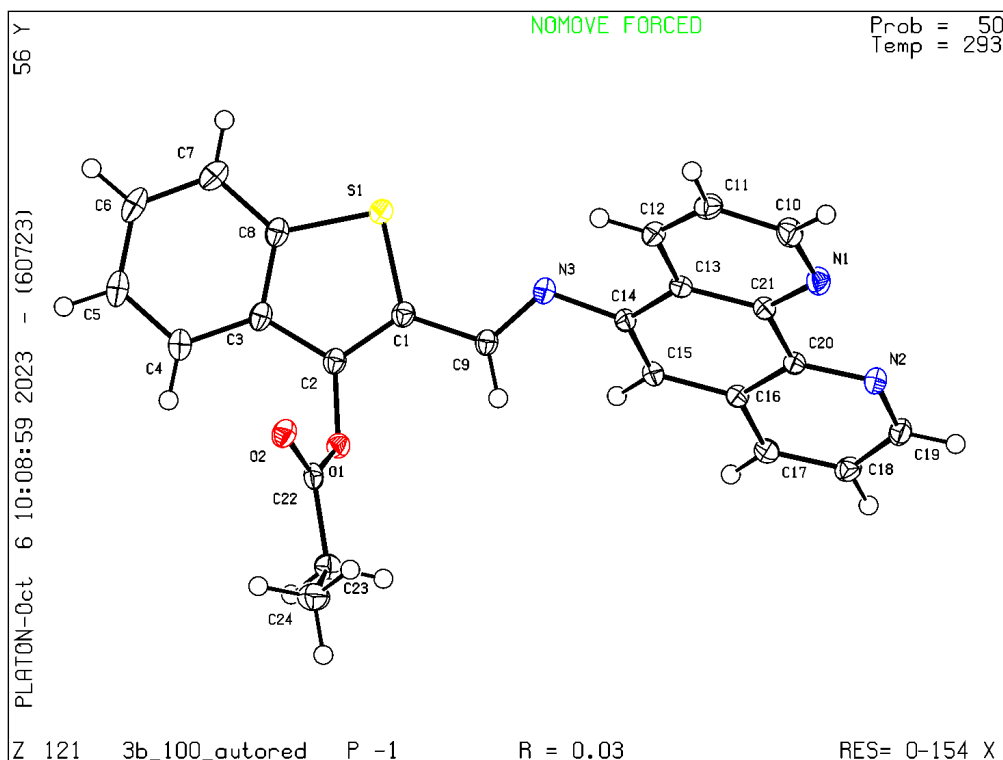

Supplement: Additional file 3 [file 1860-5397-20-47-S3.pdf]
