# Supplementary material for: Synthesis of photo- and ionochromic N-acylated 2-(aminomethylene)benzo[ b ]thiophene-3(2 Н )-ones with a terminal phenanthroline group
Source: publisher site journal article supplement (doi:10.3762/bjoc.20.47), 2024-03-11
Supplement: Additional file 2 [file 1860-5397-20-47-S2.pdf]

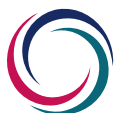

## Supporting Information

for

### **Synthesis of photo- and ionochromic N-acylated 2-(aminomethylene)benzo[*b*]thiophene-3(2*H*)-ones with a terminal phenanthroline group**

Vladimir P. Rybalkin, Sofiya Yu. Zmeeva, Lidiya L. Popova, Irina V. Dubonosova,  
Olga Yu. Karlutova, Oleg P. Demidov, Alexander D. Dubonosov and Vladimir A. Bren

*Beilstein J. Org. Chem.* **2024**, *20*, 552–560. [doi:10.3762/bjoc.20.47](https://doi.org/10.3762/bjoc.20.47)

### **$^1\text{H}$ and $^{13}\text{C}$ NMR, IR and HRMS spectra of all novel compounds**

**Figure S1:**  $^1\text{H}$  NMR spectrum of compound **1** in  $\text{CDCl}_3$ .

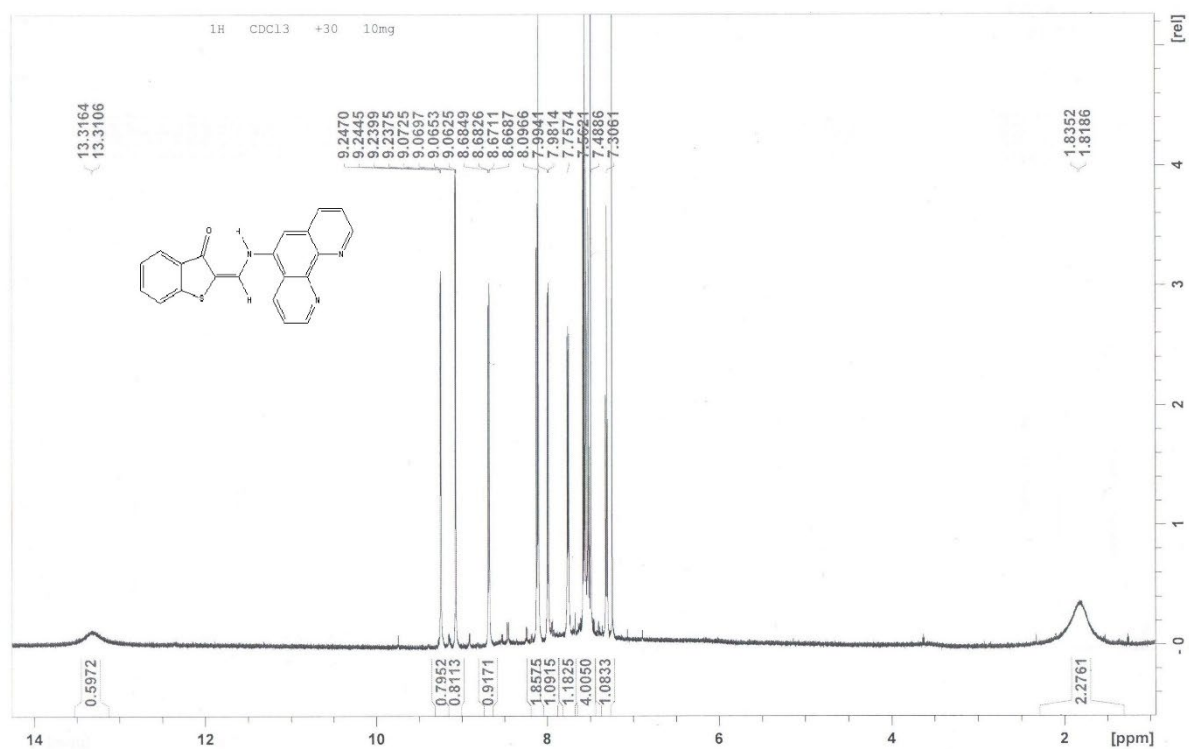

**Figure S2:**  $^1\text{H}$  NMR spectrum of compound **2a** in  $\text{CDCl}_3$ .

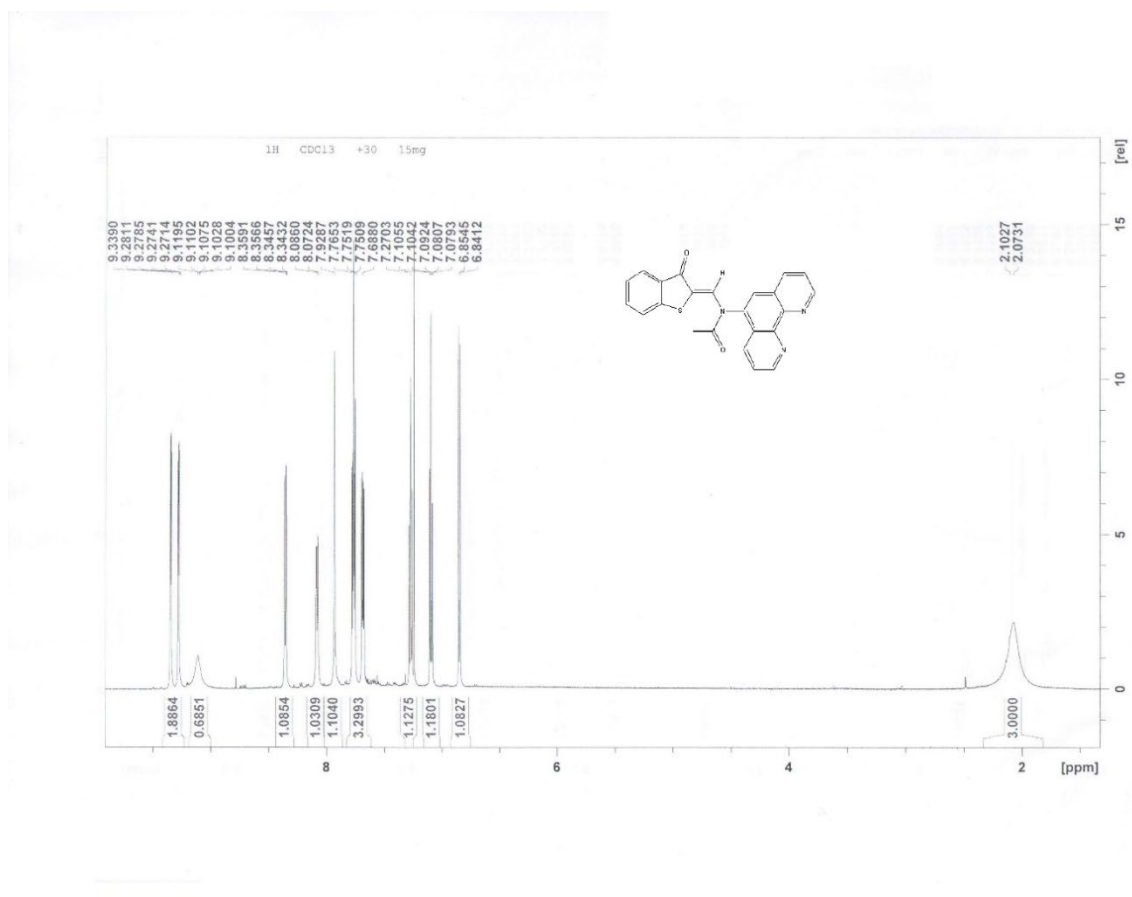

Figure S3:  $^1\text{H}$  NMR spectrum of compound **2b** in  $\text{CDCl}_3$ .

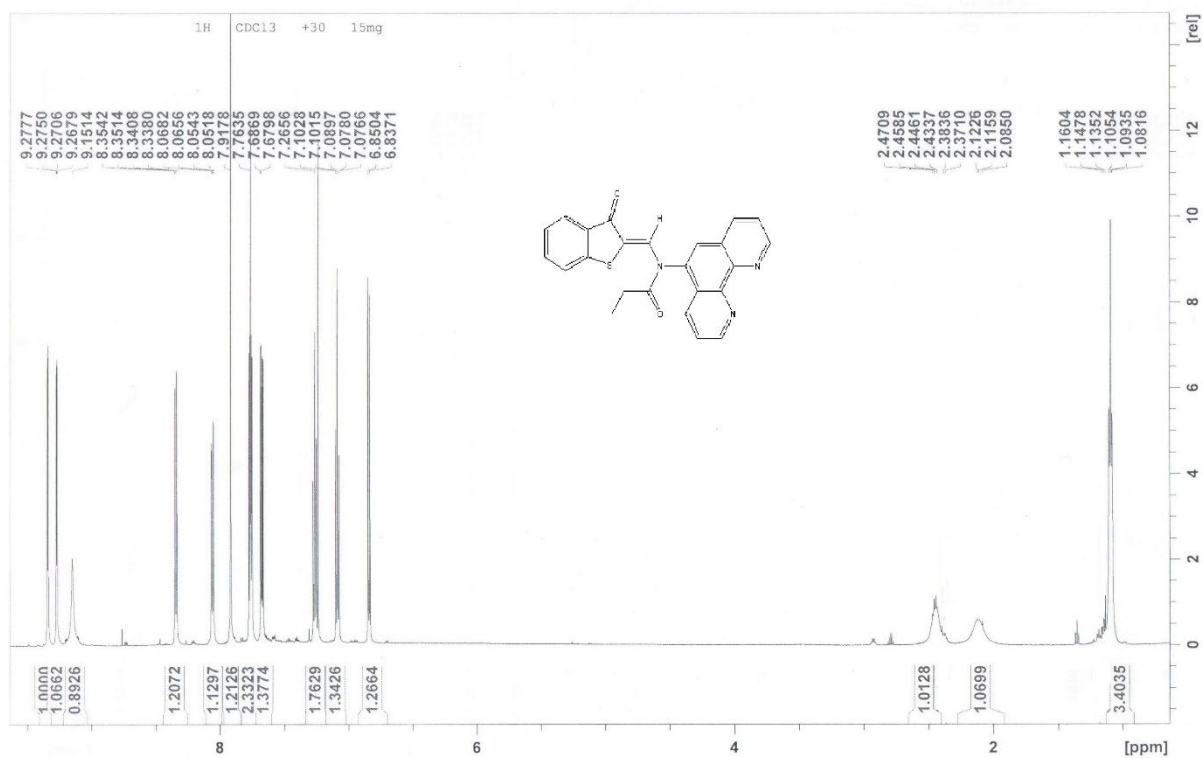

Figure S4:  $^1\text{H}$  NMR spectrum of compound **2c** in  $\text{CDCl}_3$ .

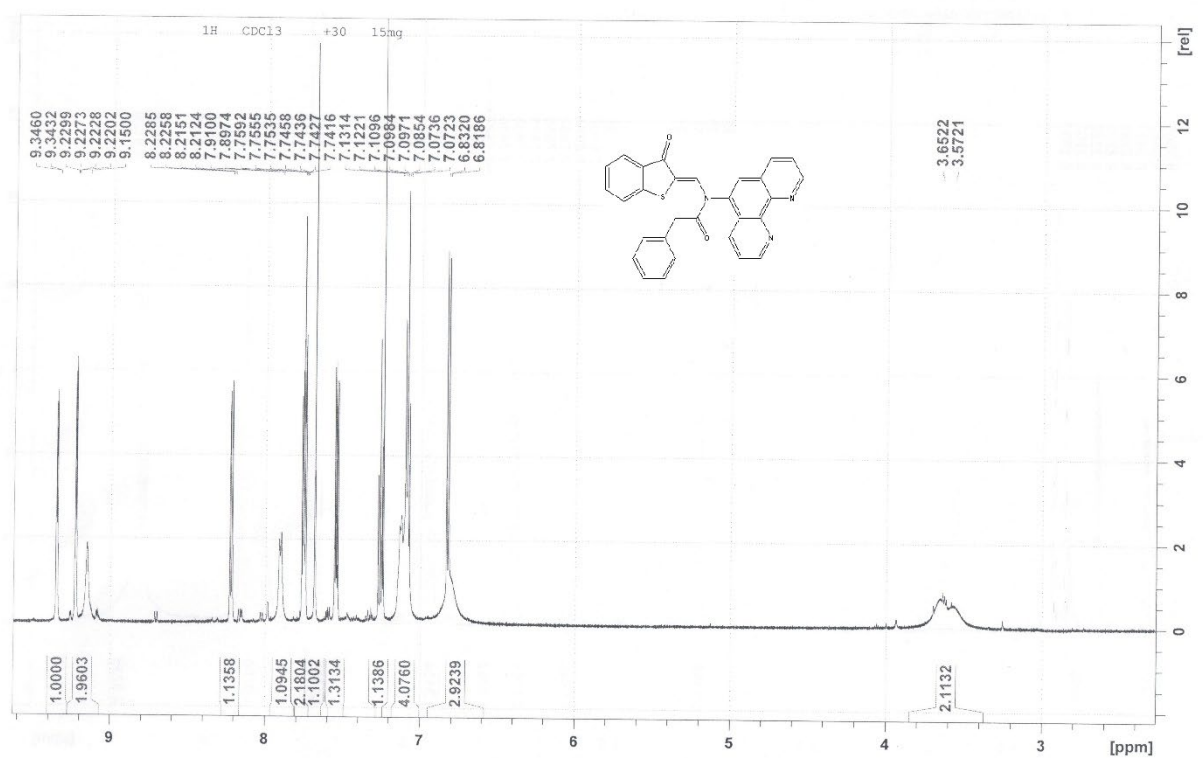

Figure S5:  $^1\text{H}$  NMR spectrum of compound **3a** in  $\text{CDCl}_3$ .

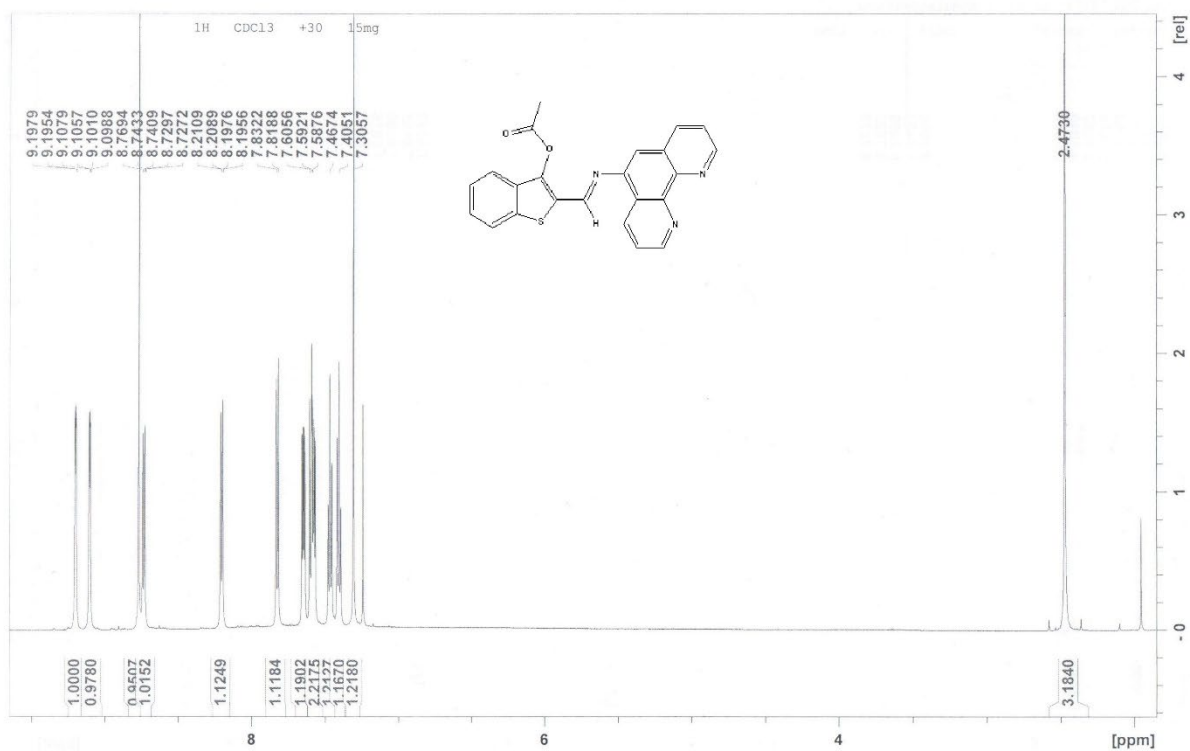

Figure S6:  $^1\text{H}$  NMR spectrum of compound **3b** in  $\text{CDCl}_3$ .

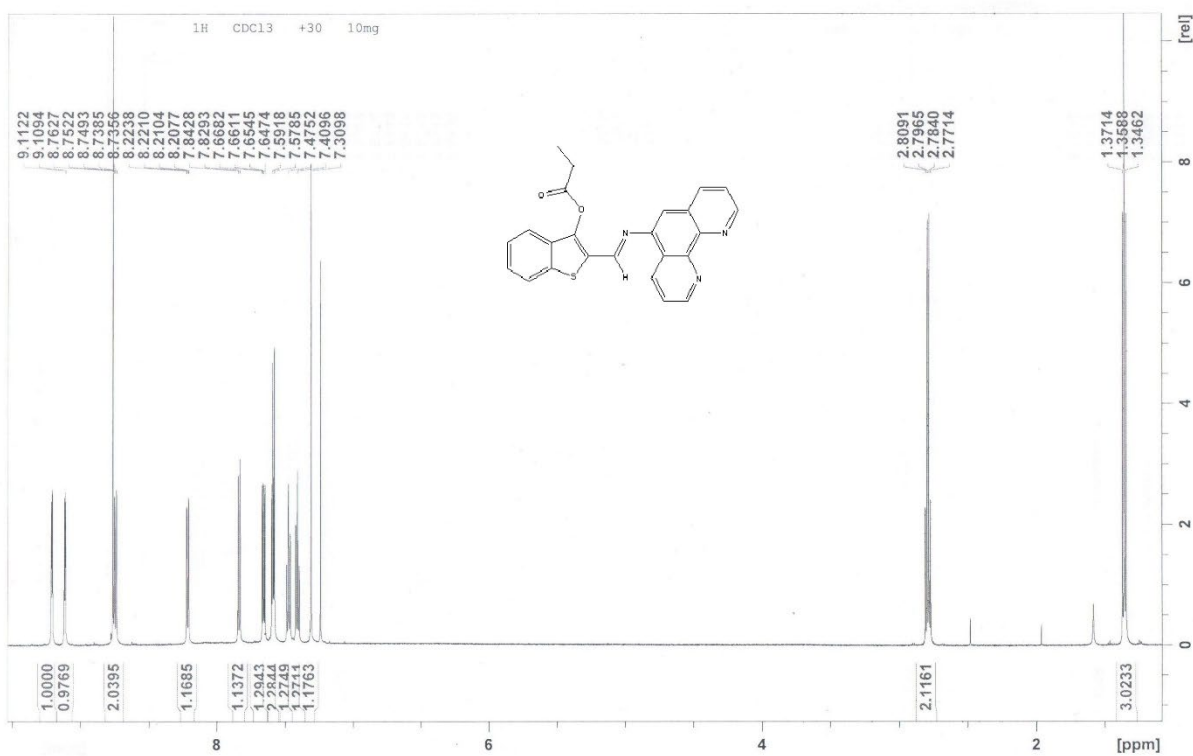

**Figure S7:**  $^1\text{H}$  NMR spectrum of compound **3c** in  $\text{CDCl}_3$ .

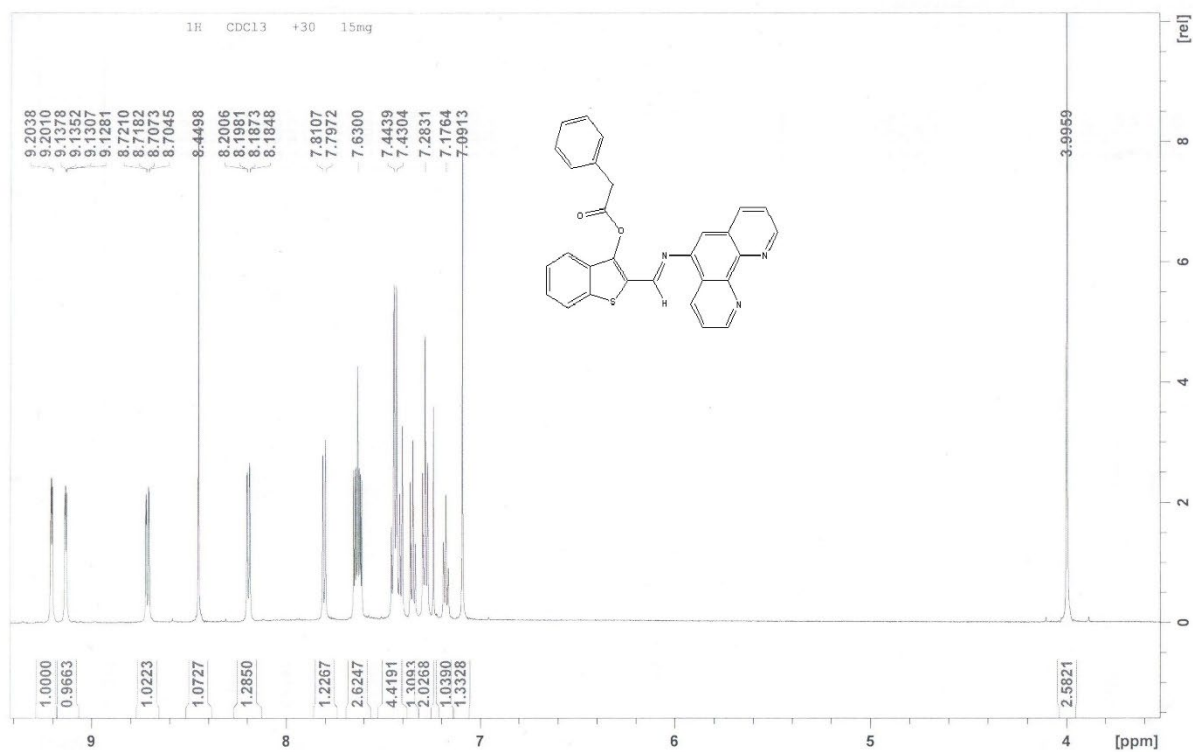

**Figure S8:**  $^{13}\text{C}$  NMR spectrum of compound **1** in  $\text{CDCl}_3$ .

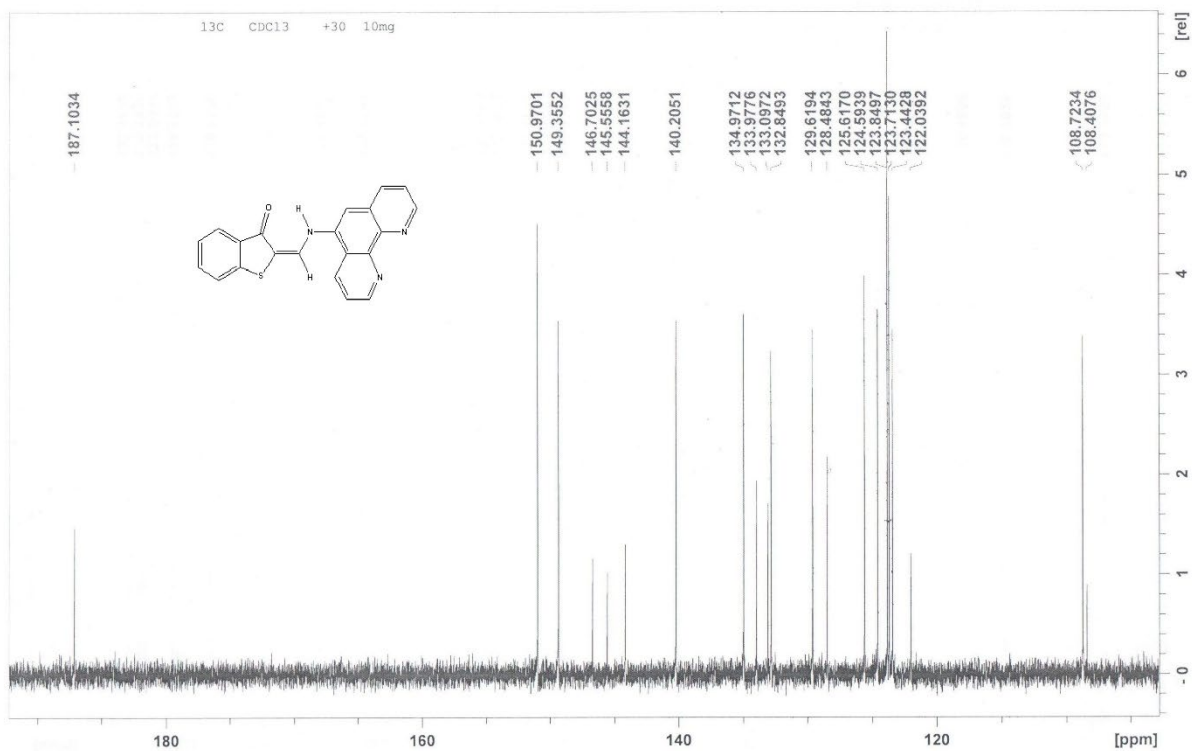

**Figure S9:**  $^{13}\text{C}$  NMR spectrum of compound **2a** in  $\text{CDCl}_3$ .

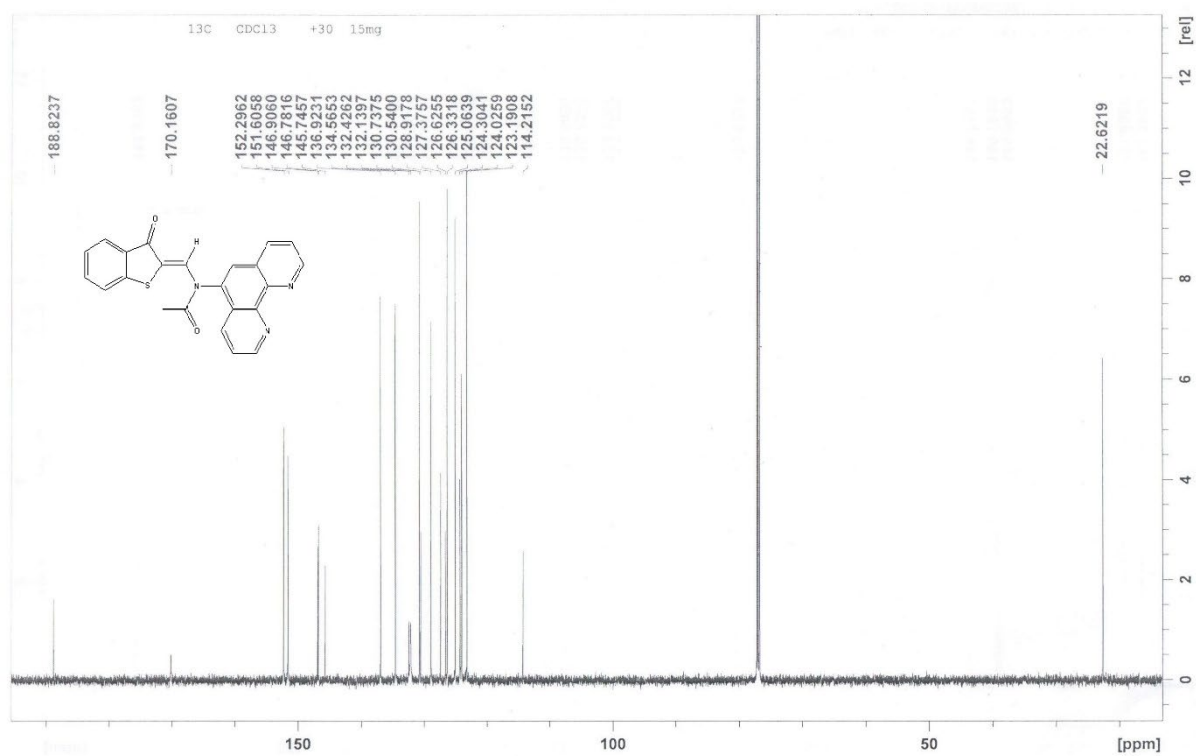

**Figure S10:**  $^{13}\text{C}$  NMR spectrum of compound **2b** in  $\text{CDCl}_3$ .

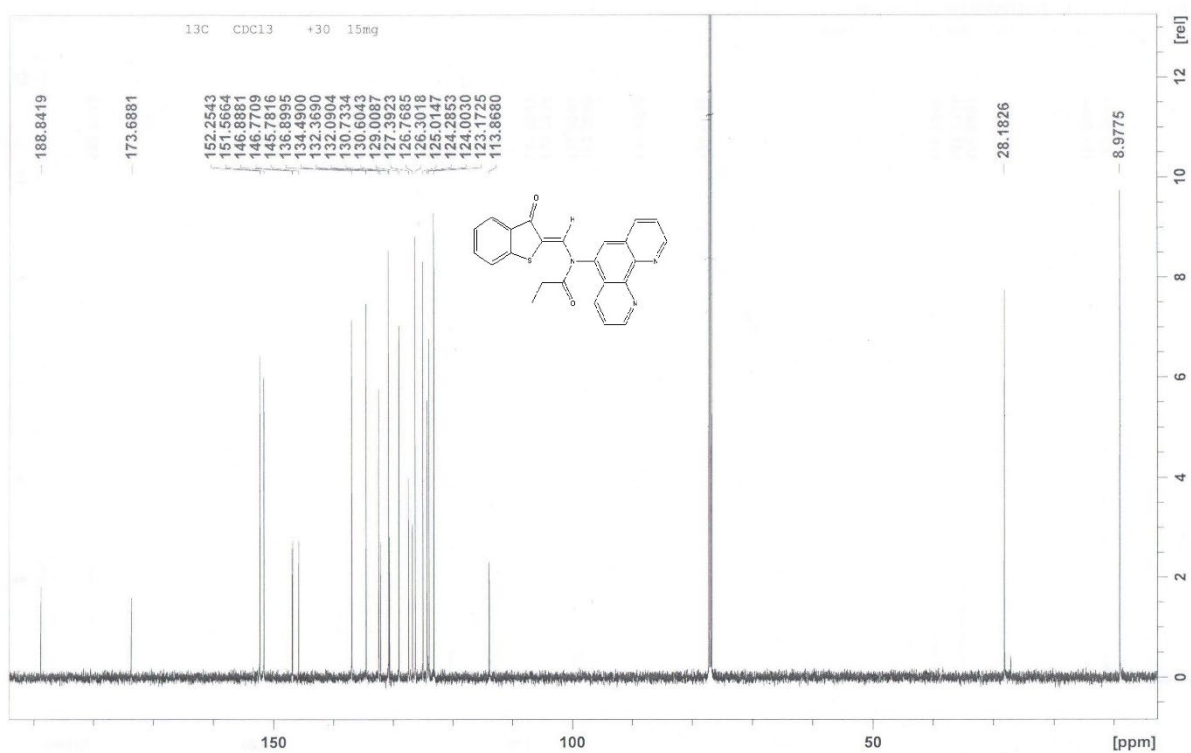

**Figure S11:**  $^{13}\text{C}$  NMR spectrum of compound **2c** in  $\text{CDCl}_3$ .

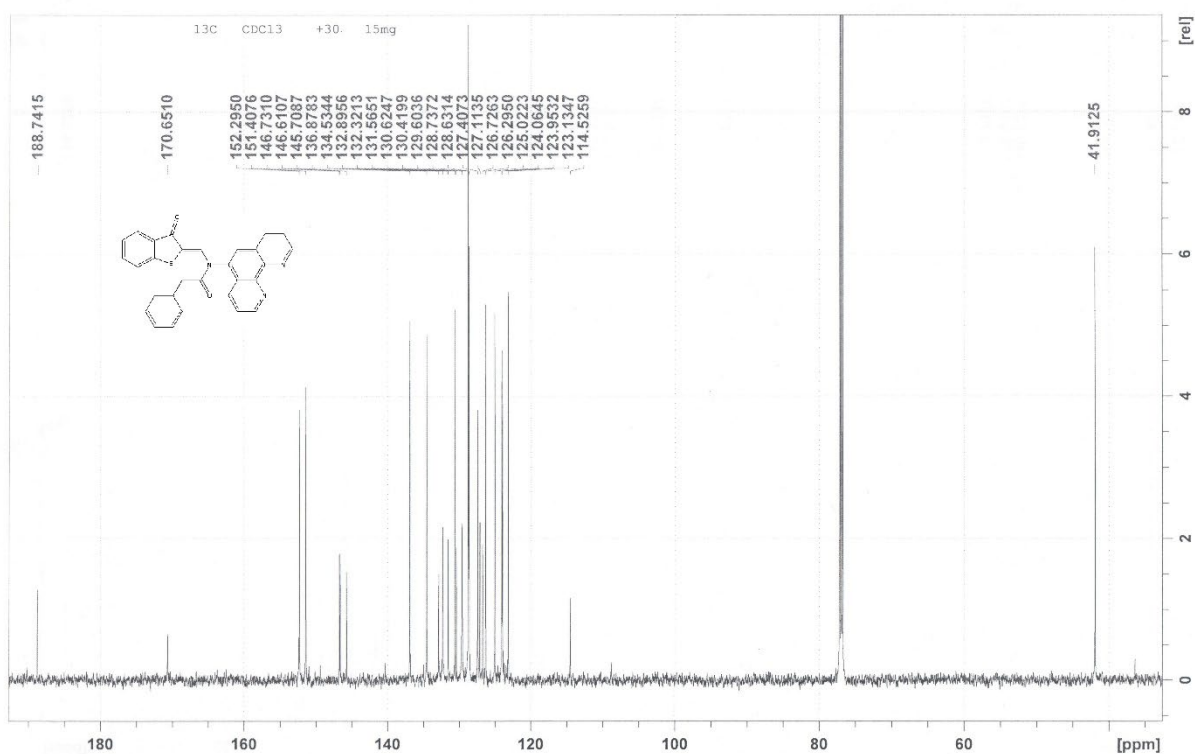

**Figure S12:**  $^{13}\text{C}$  NMR spectrum of compound **3a** in  $\text{CDCl}_3$ .

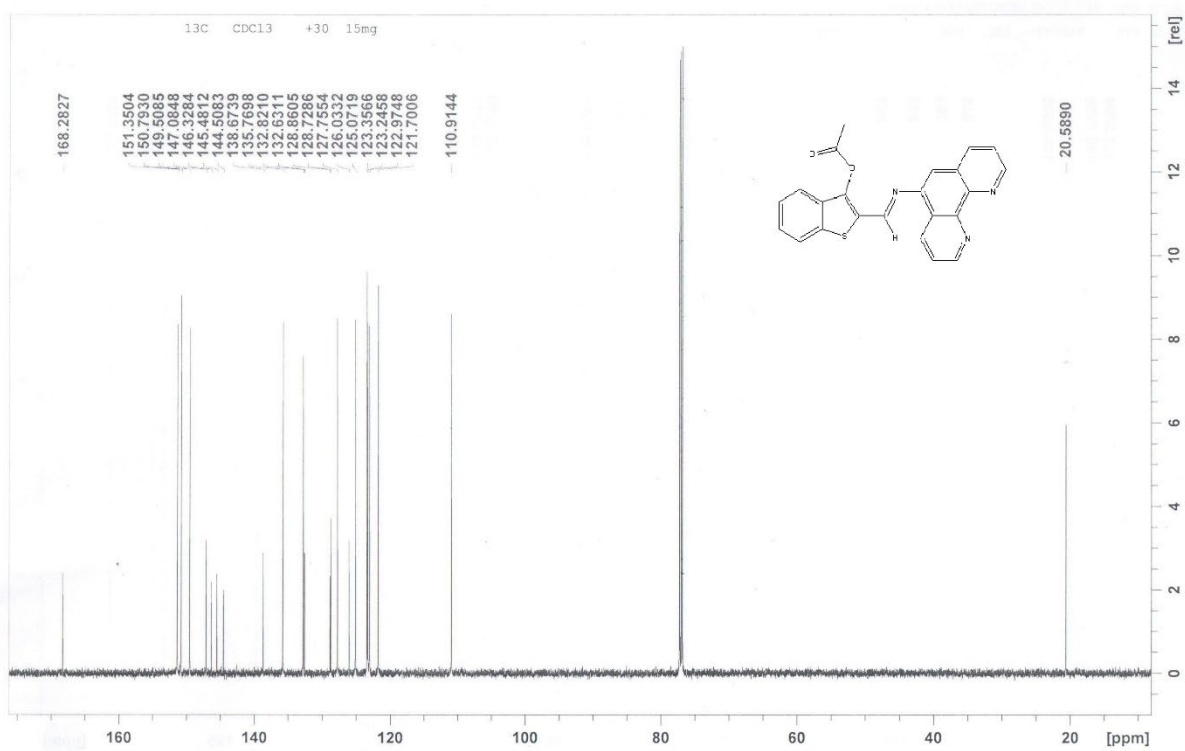



**Figure S13:**  $^{13}\text{C}$  NMR spectrum of compound **3b** in  $\text{CDCl}_3$ .

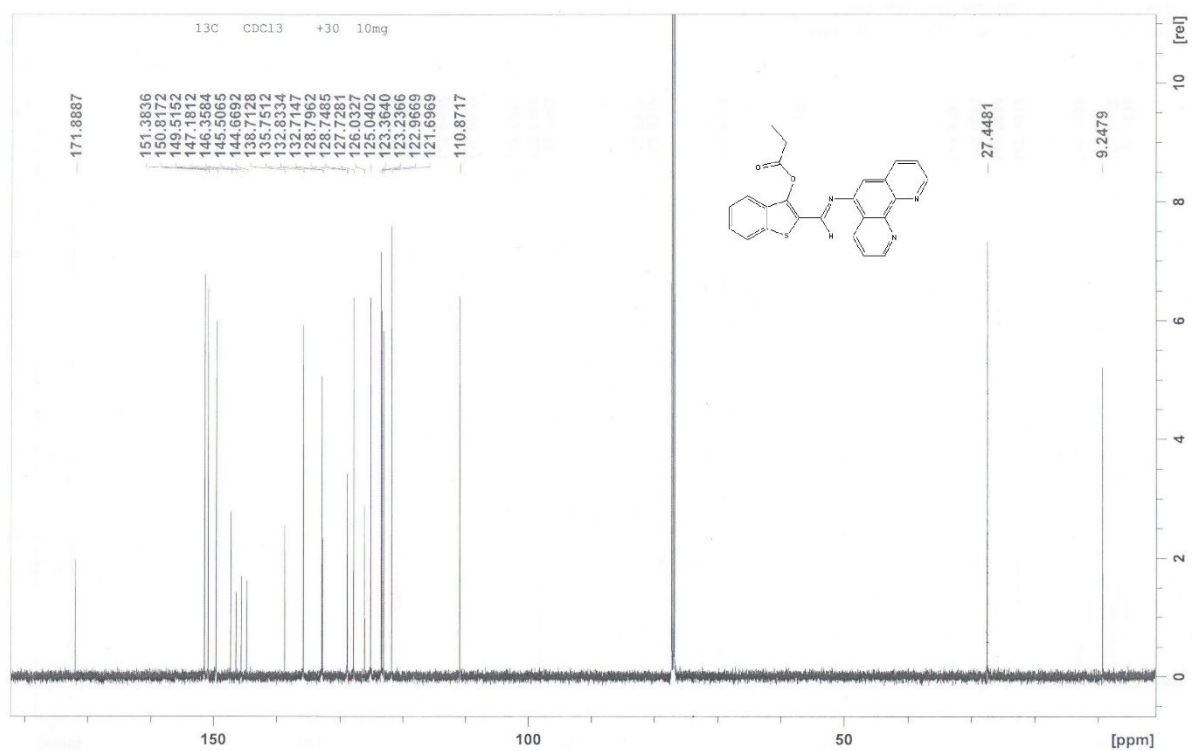

**Figure S14:**  $^{13}\text{C}$  NMR spectrum of compound **3c** in  $\text{CDCl}_3$ .

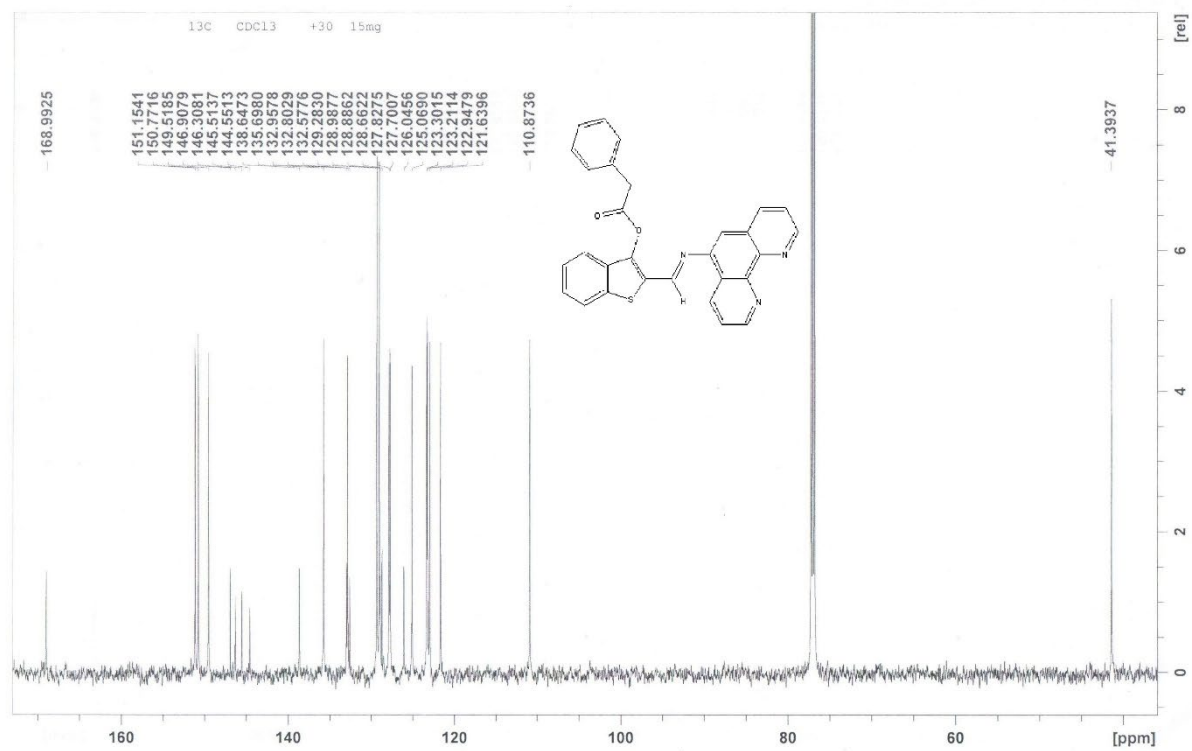



Figure S15: IR spectrum of compound 1.

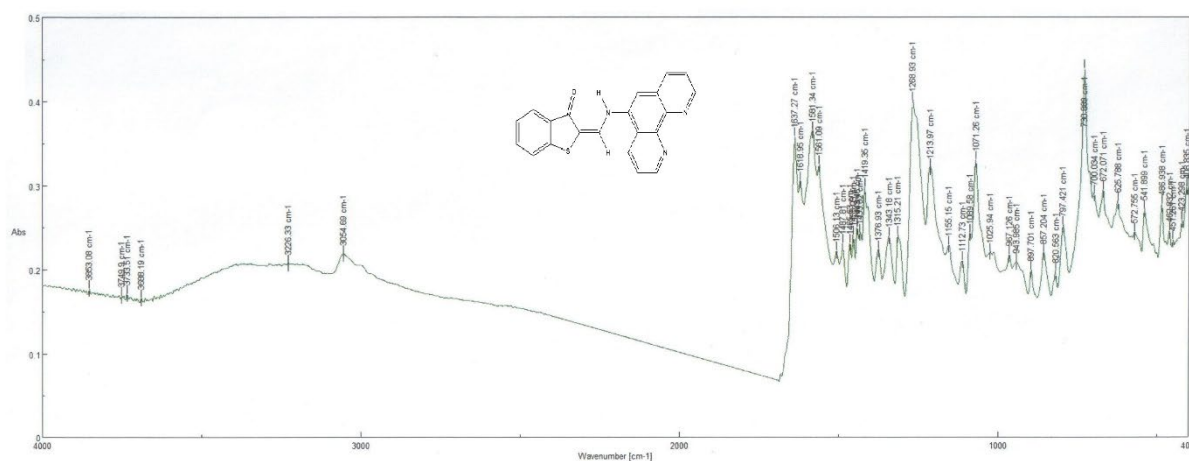

Figure S16: IR spectrum of compound 2a.

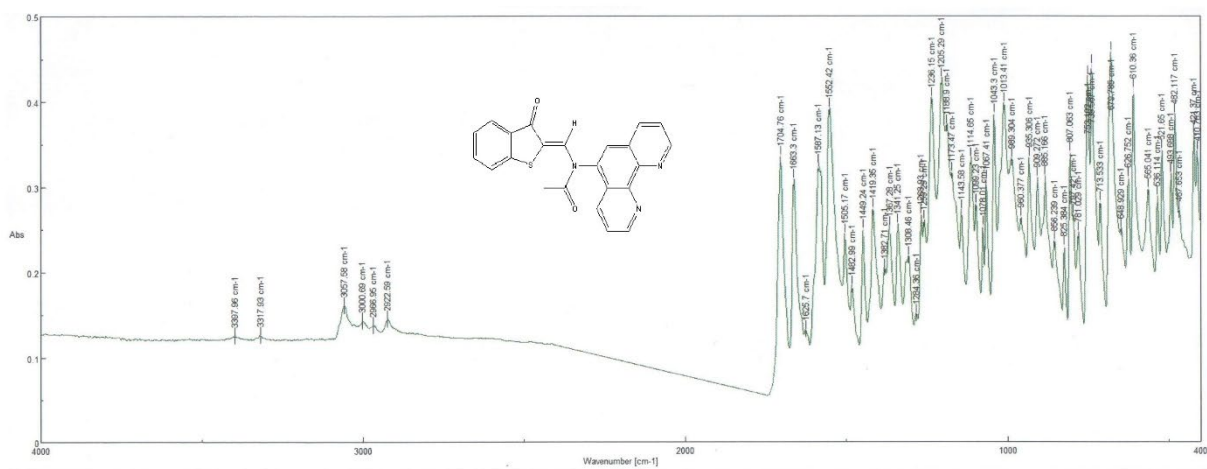

Figure S17: IR spectrum of compound 2b.

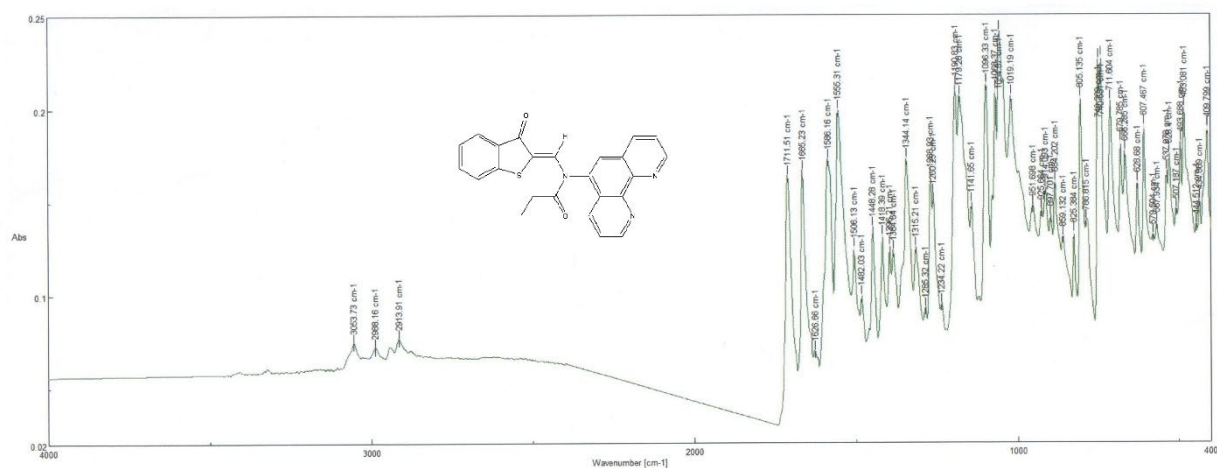

Figure S18: IR spectrum of compound 2c.

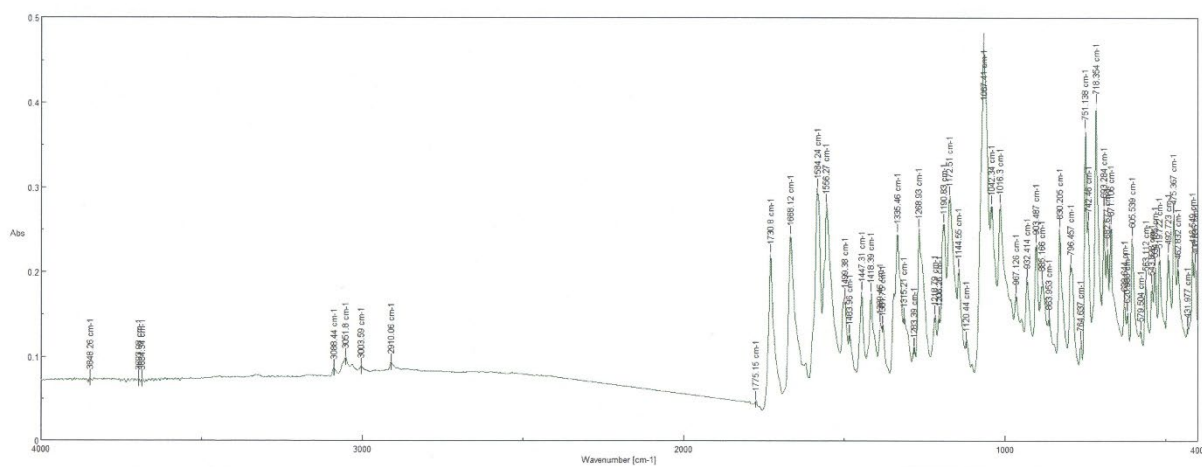

Figure S19: IR spectrum of compound 3a.

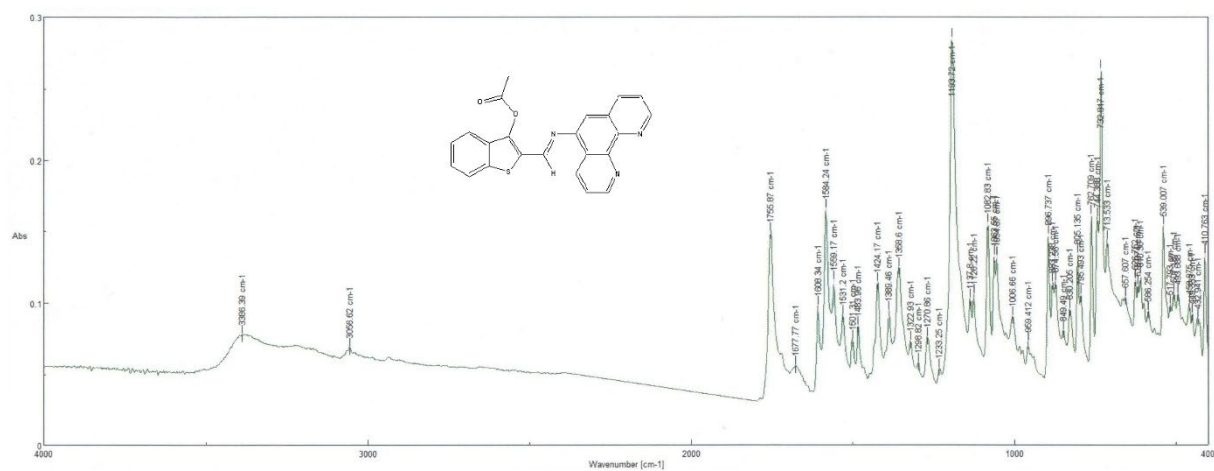

Figure S20: IR spectrum of compound 3b.

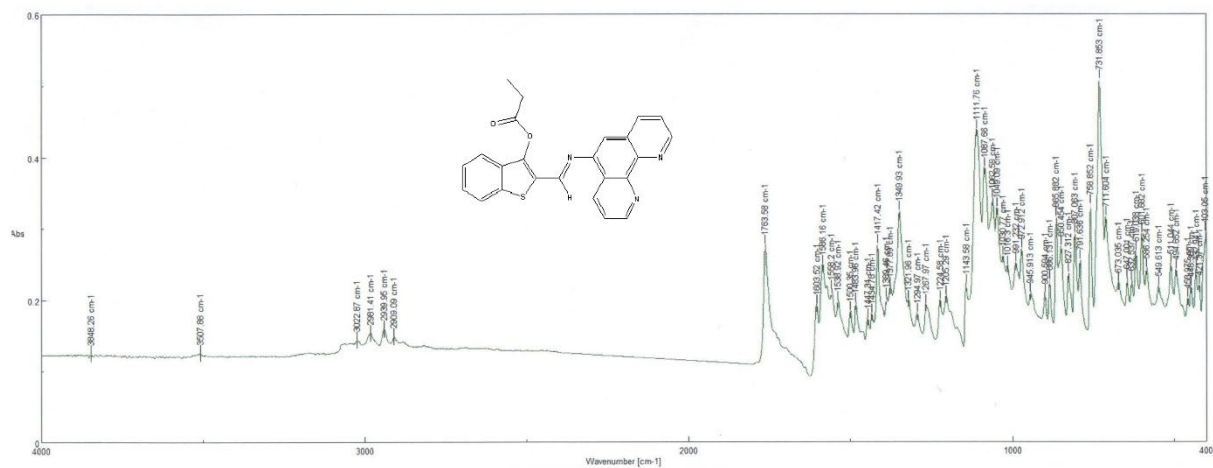

Figure S21: IR spectrum of compound 3c.

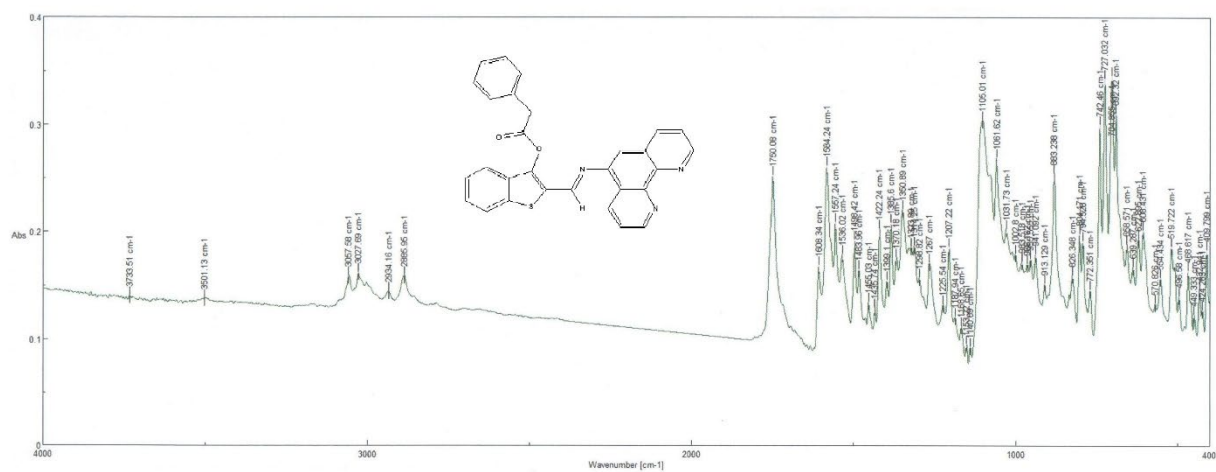

**Figure S22: Mass spectrum of compound 1.**

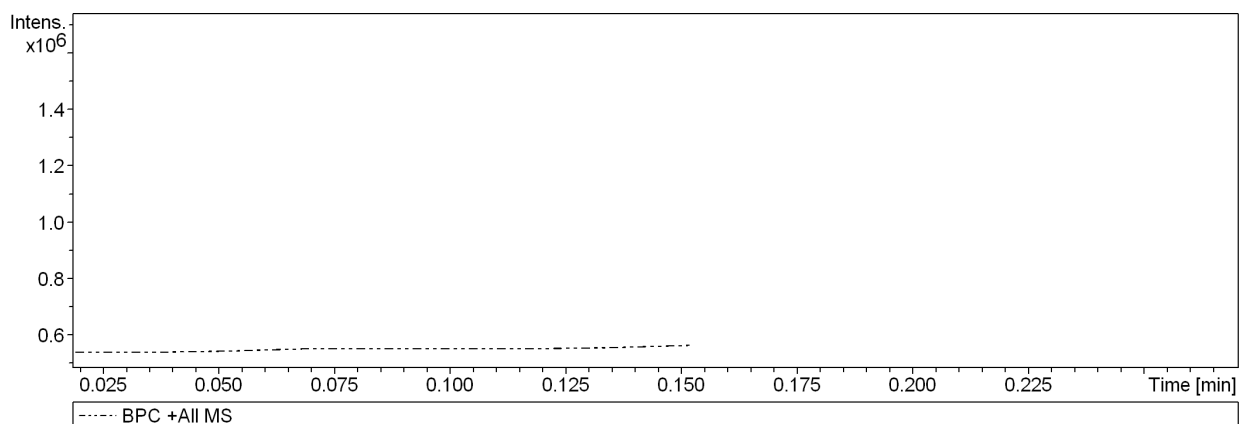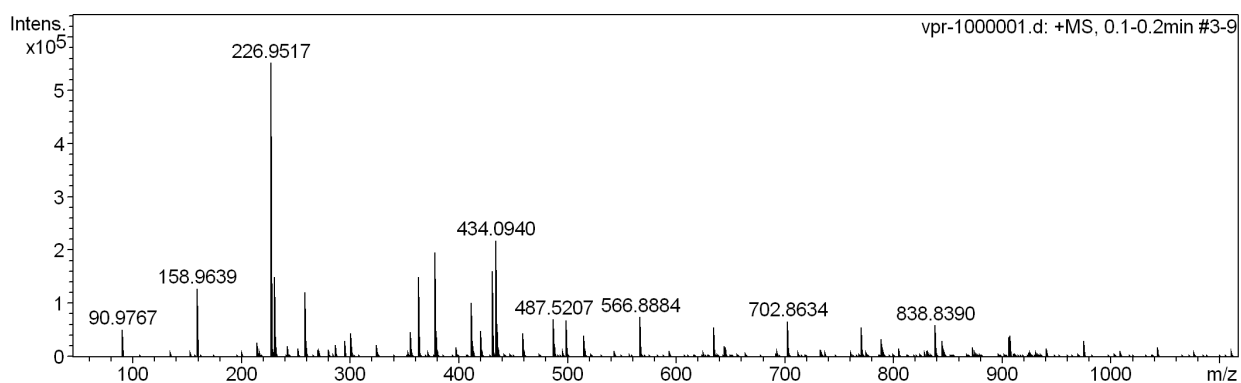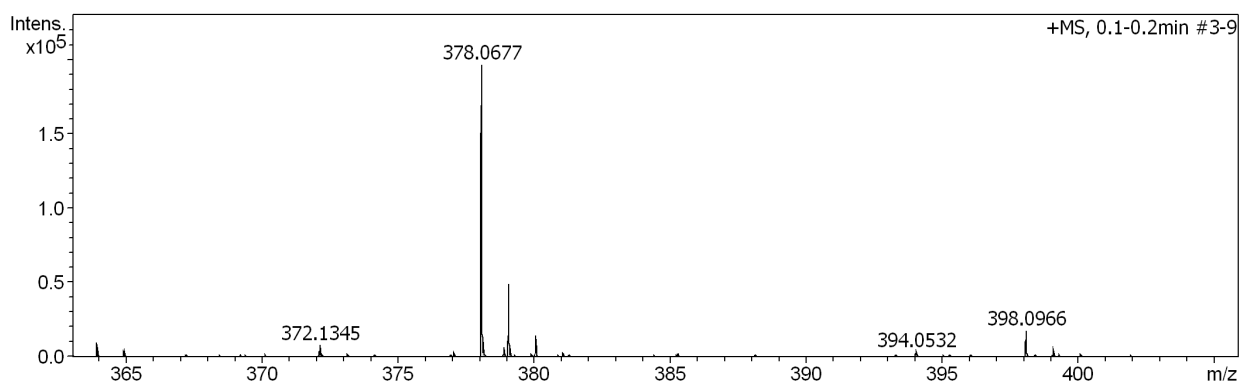

### Display Report

| Meas. m/z | # | Ion Formula                                         | m/z      | err [ppm] | mSigma | Score | rdb    | e <sup>-</sup> Conf | N-Rule |    |
|-----------|---|-----------------------------------------------------|----------|-----------|--------|-------|--------|---------------------|--------|----|
| 378.0677  | 1 | C <sub>23</sub> H <sub>12</sub> N <sub>3</sub> OS   | 378.0696 | 4.8       | 10.7   | 1     | 100.00 | 19.5                | even   | ok |
|           | 1 | C <sub>21</sub> H <sub>13</sub> N <sub>3</sub> NaOS | 378.0672 | -1.5      | 1.6    | 1     | 100.00 | 16.5                | even   | ok |

**+MS, 0.1-0.2min #3-9**

**Figure S23: Mass spectrum of compound 2a.**

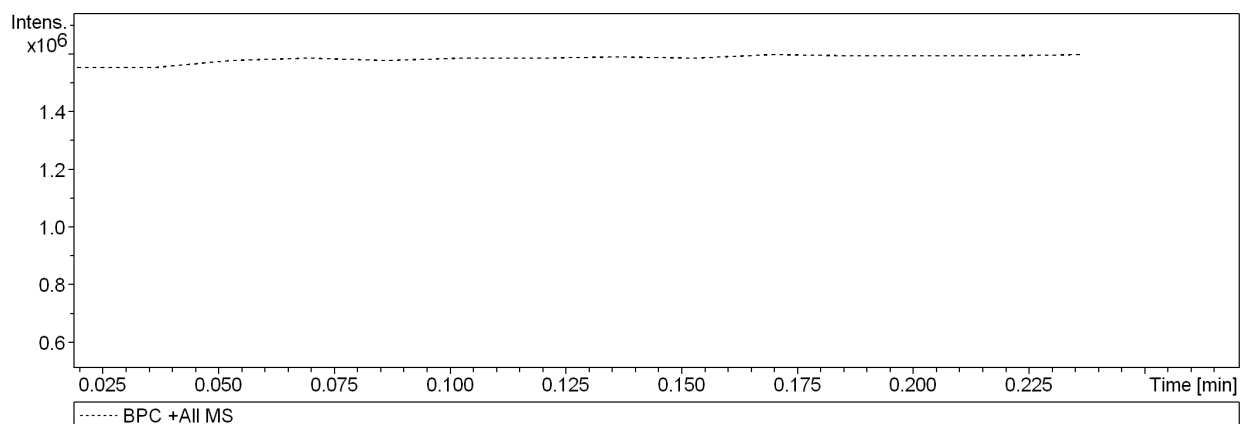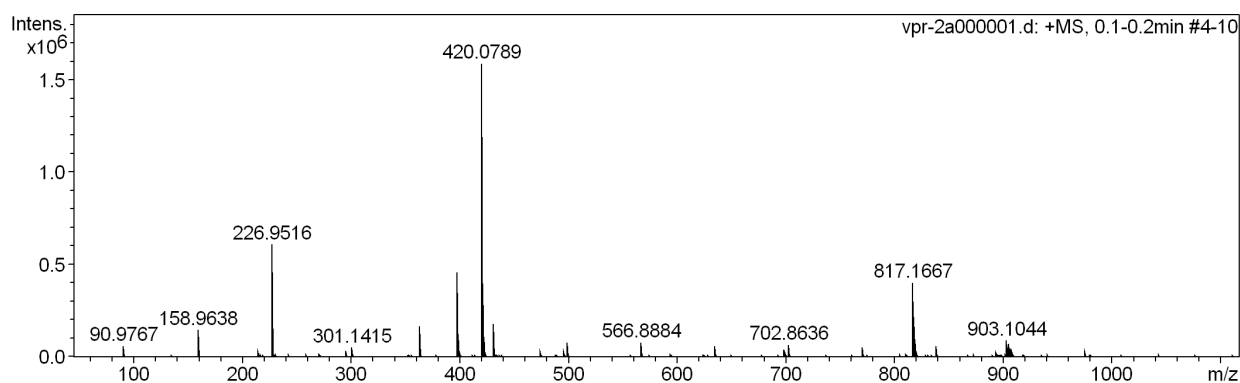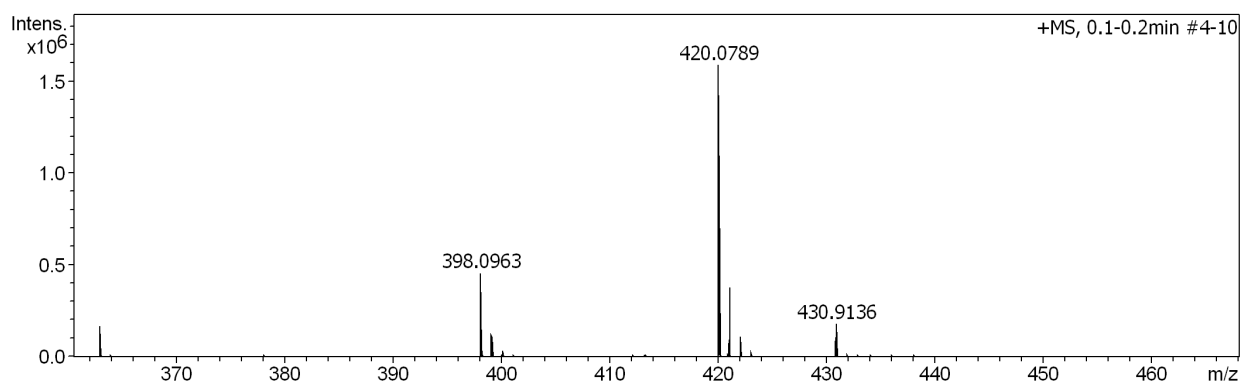

### Display Report

| Meas. m/z | # | Ion Formula   | m/z      | err [ppm] | mSigma | Score | rdb    | e <sup>-</sup> Conf | N-Rule |    |
|-----------|---|---------------|----------|-----------|--------|-------|--------|---------------------|--------|----|
| 398.0963  | 1 | C23H16N3O2S   | 398.0958 | -1.4      | 3.4    | 1     | 100.00 | 17.5                | even   | ok |
| 420.0789  | 1 | C25H14N3O2S   | 420.0801 | 3.0       | 28.6   | 1     | 100.00 | 20.5                | even   | ok |
|           | 1 | C23H15N3NaO2S | 420.0777 | -2.8      | 17.5   | 1     | 100.00 | 17.5                | even   | ok |

**+MS, 0.1-0.2min #4-10**

**Figure S24:** Mass spectrum of compound **2b**.

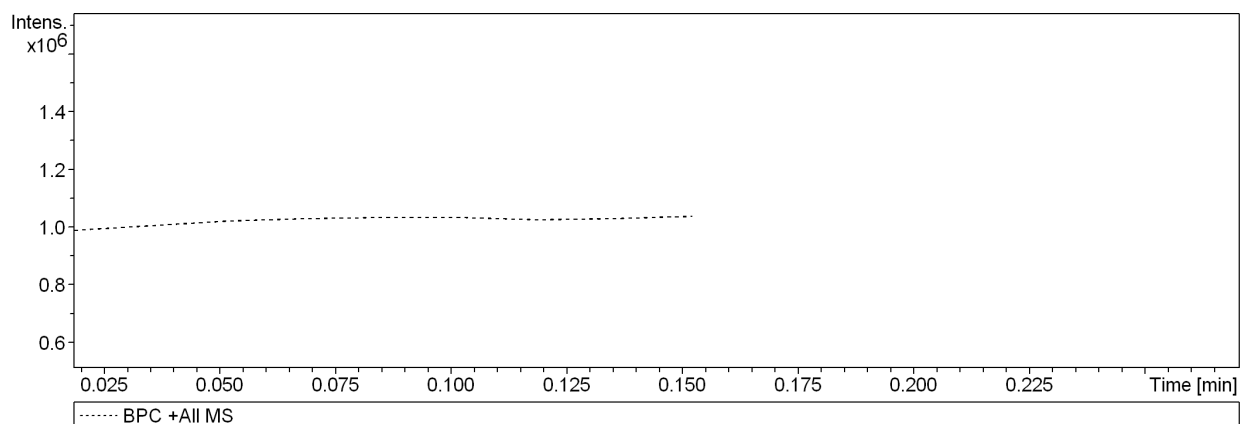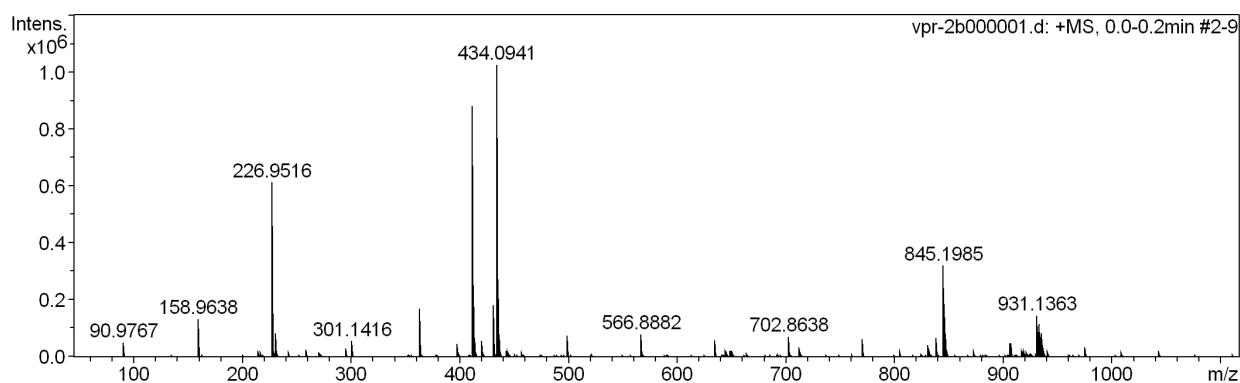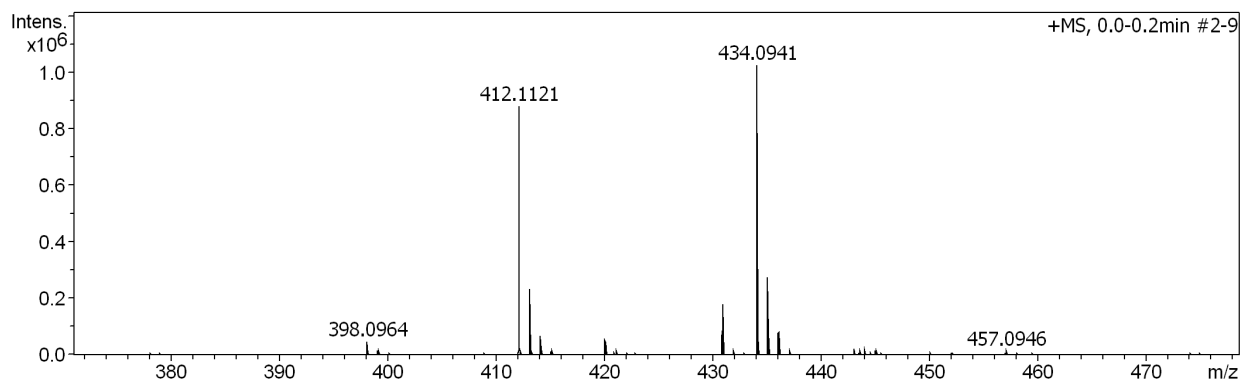

### Display Report

| Meas. m/z | # | Ion Formula                                                       | m/z      | err [ppm] | mSigma | Score | rdb    | e <sup>-</sup> Conf | N-Rule  |
|-----------|---|-------------------------------------------------------------------|----------|-----------|--------|-------|--------|---------------------|---------|
| 412.1121  | 1 | C <sub>24</sub> H <sub>18</sub> N <sub>3</sub> O <sub>2</sub> S   | 412.1114 | -1.8      | 8.6    | 1     | 100.00 | 17.5                | even ok |
| 434.0941  | 1 | C <sub>26</sub> H <sub>16</sub> N <sub>3</sub> O <sub>2</sub> S   | 434.0958 | 3.8       | 20.2   | 1     | 100.00 | 20.5                | even ok |
|           | 1 | C <sub>24</sub> H <sub>17</sub> N <sub>3</sub> NaO <sub>2</sub> S | 434.0934 | -1.7      | 9.2    | 1     | 100.00 | 17.5                | even ok |

+MS, 0.0-0.2min #2-9



**Figure S25:** Mass spectrum of compound **2c**.

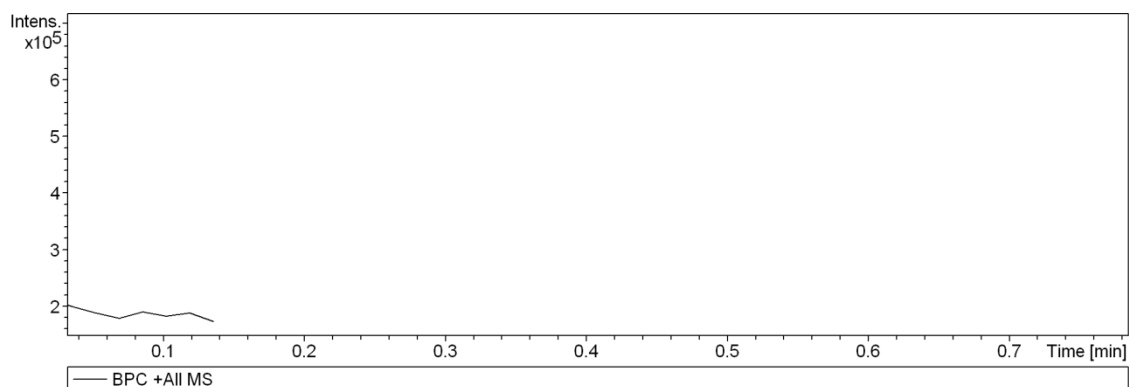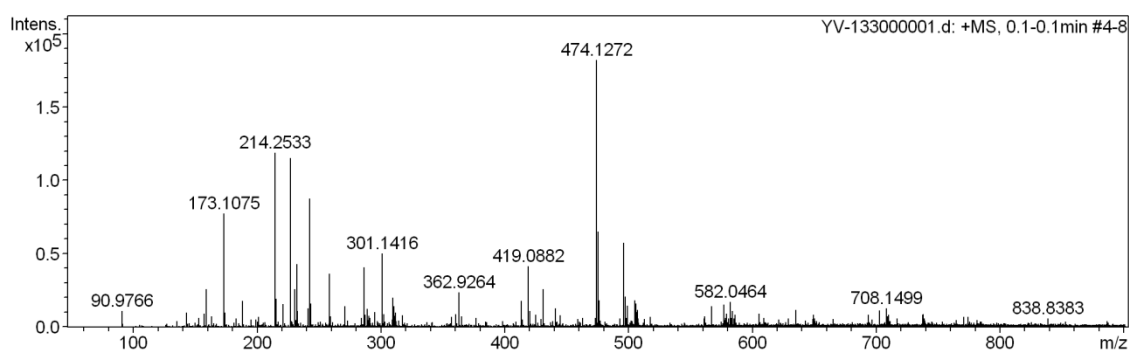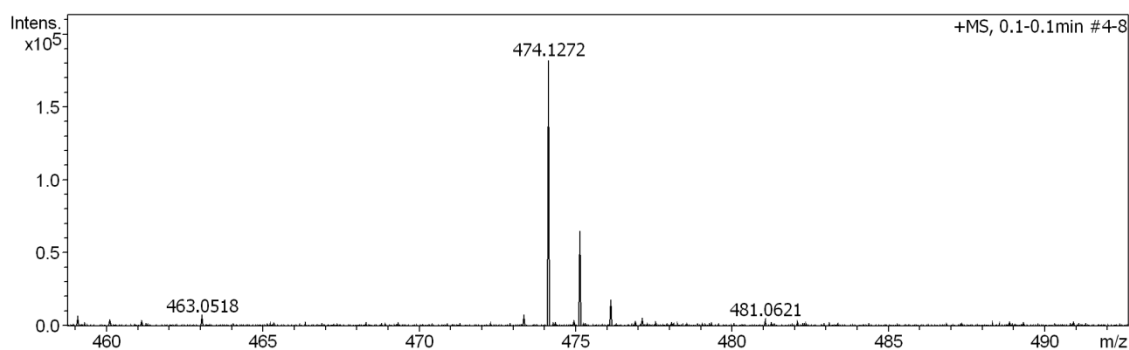

### Display Report

| Meas. m/z | # | Ion Formula                                                     | m/z      | err [ppm] | mSigma | Score | rdb    | e <sup>-</sup> Conf | N-Rule  |
|-----------|---|-----------------------------------------------------------------|----------|-----------|--------|-------|--------|---------------------|---------|
| 474.1272  | 1 | C <sub>29</sub> H <sub>20</sub> N <sub>3</sub> O <sub>2</sub> S | 474.1271 | -0.2      | 11.5   | 1     | 100.00 | 21.5                | even ok |
|           | 1 | C <sub>32</sub> H <sub>21</sub> NNaS                            | 474.1287 | 3.2       | 4.4    | 1     | 100.00 | 22.5                | even ok |
|           | 1 | C <sub>29</sub> H <sub>20</sub> N <sub>3</sub> O <sub>2</sub> S | 474.1271 | -0.2      | 11.5   | 1     | 100.00 | 21.5                | even ok |

**+MS, 0.1-0.1min #4-8**

**Figure S26:** Mass spectrum of compound **3a**.

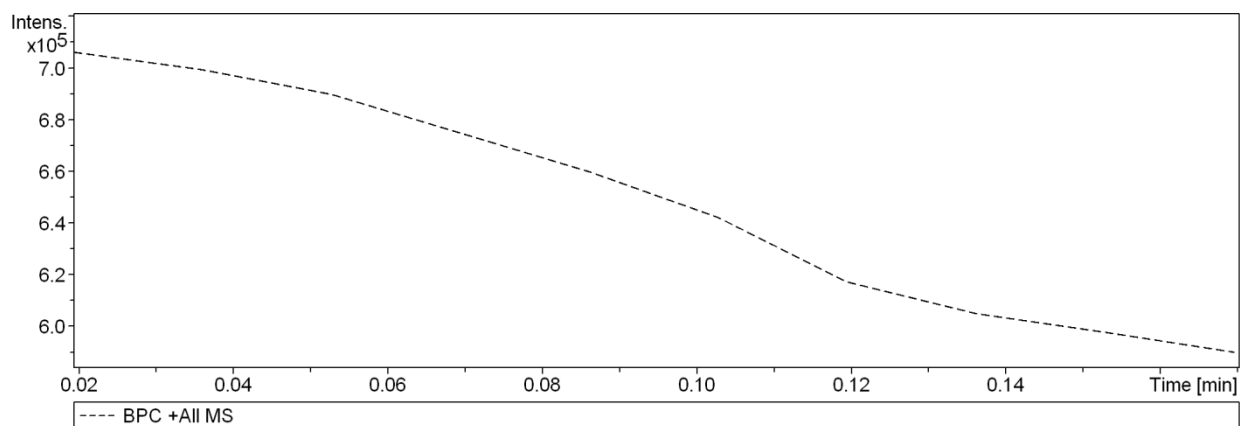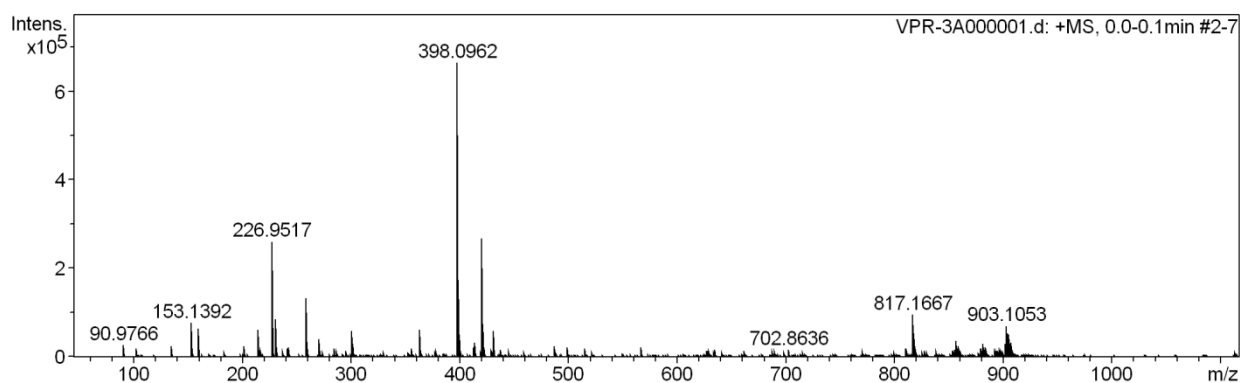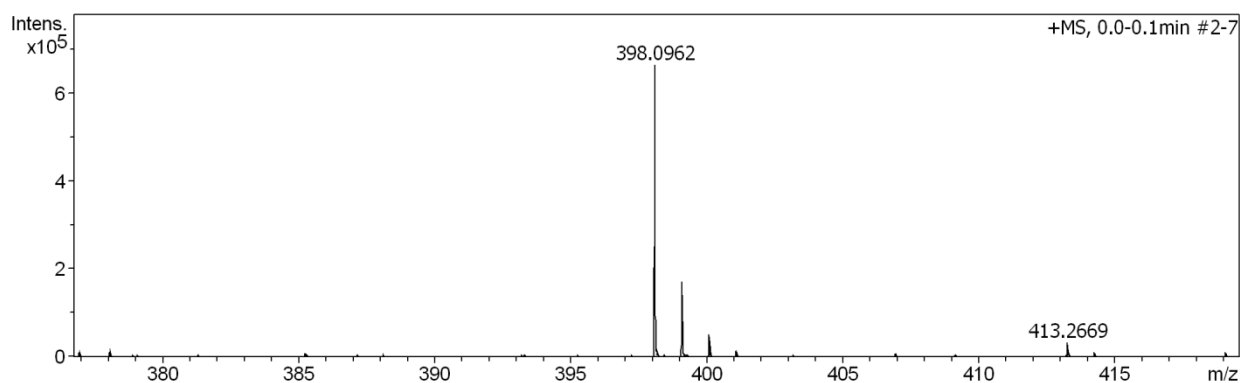

### Display Report

| Meas. m/z | # | Ion Formula                                                     | m/z      | err [ppm] | mSigma | Score  | rdb  | e <sup>-</sup> Conf | N-Rule |
|-----------|---|-----------------------------------------------------------------|----------|-----------|--------|--------|------|---------------------|--------|
| 398.0962  | 1 | C <sub>23</sub> H <sub>16</sub> N <sub>3</sub> O <sub>2</sub> S | 398.0958 | -1.1      | 6.3    | 100.00 | 17.5 | even                | ok     |

+MS, 0.0-0.1min #2-7

**Figure S27:** Mass spectrum of compound **3b**.

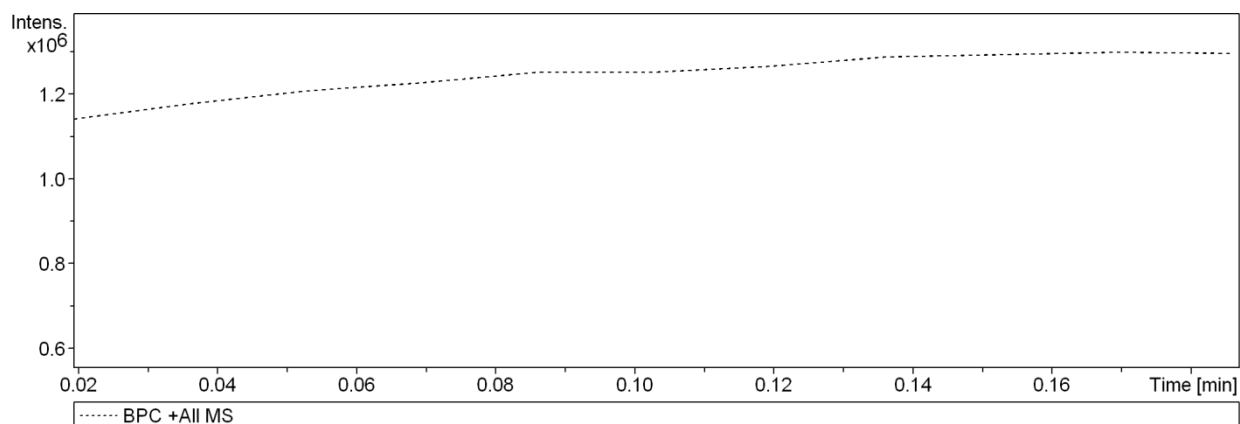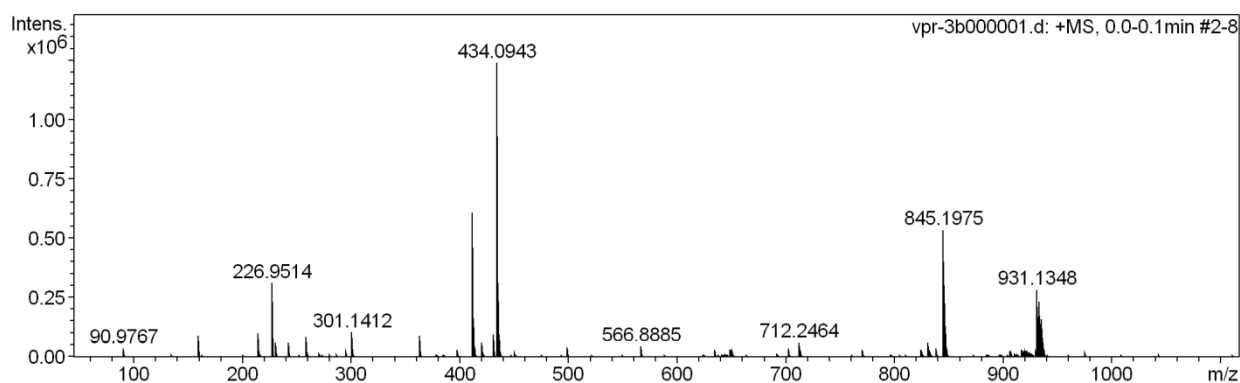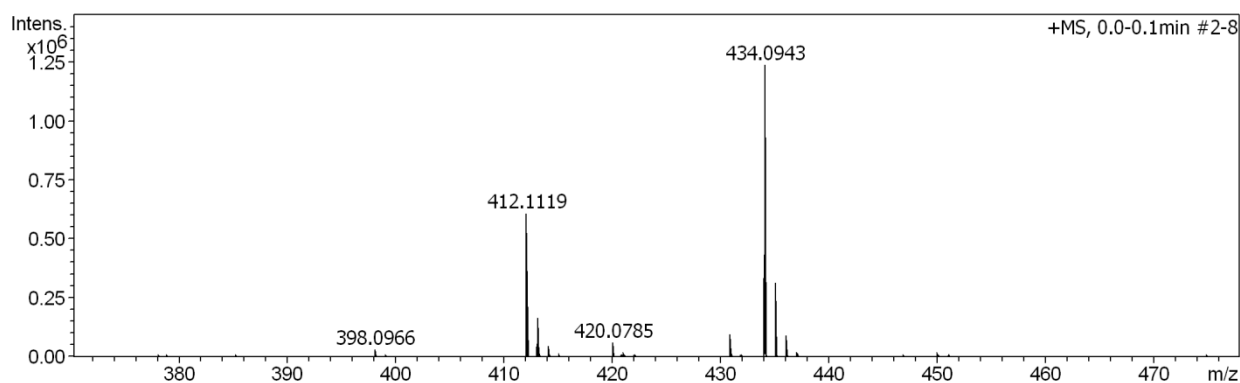

### Display Report

| Meas. m/z | # | Ion Formula                                                       | m/z      | err [ppm] | mSigma | Score  | rdb  | e <sup>-</sup> Conf | N-Rule |
|-----------|---|-------------------------------------------------------------------|----------|-----------|--------|--------|------|---------------------|--------|
| 412.1119  | 1 | C <sub>24</sub> H <sub>18</sub> N <sub>3</sub> O <sub>2</sub> S   | 412.1114 | -1.3      | 8.0    | 100.00 | 17.5 | even                | ok     |
| 434.0943  | 1 | C <sub>26</sub> H <sub>16</sub> N <sub>3</sub> O <sub>2</sub> S   | 434.0958 | 3.3       | 26.7   | 100.00 | 20.5 | even                | ok     |
|           | 1 | C <sub>24</sub> H <sub>17</sub> N <sub>3</sub> NaO <sub>2</sub> S | 434.0934 | -2.2      | 15.5   | 100.00 | 17.5 | even                | ok     |

**+MS, 0.0-0.1min #2-8**

**Figure S28:** Mass spectrum of compound **3c**.

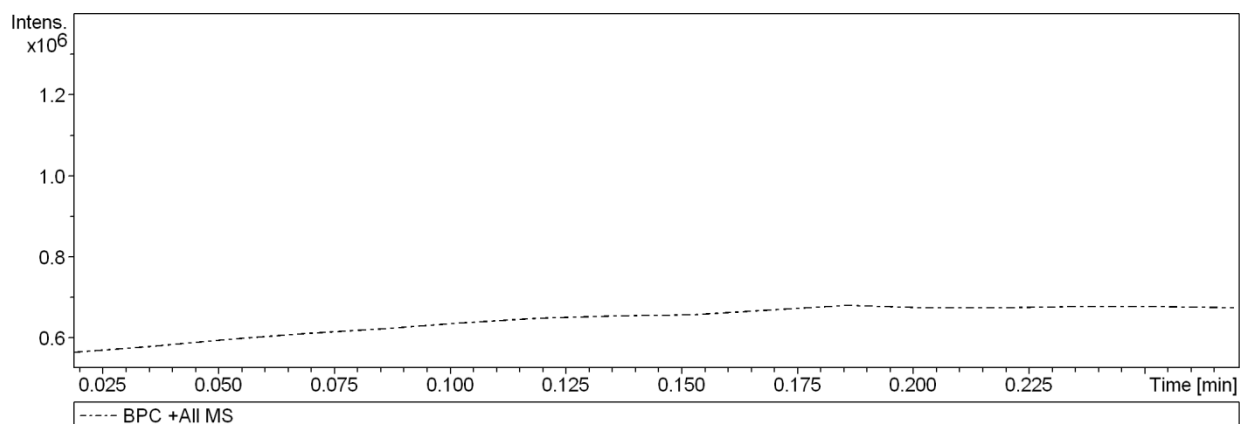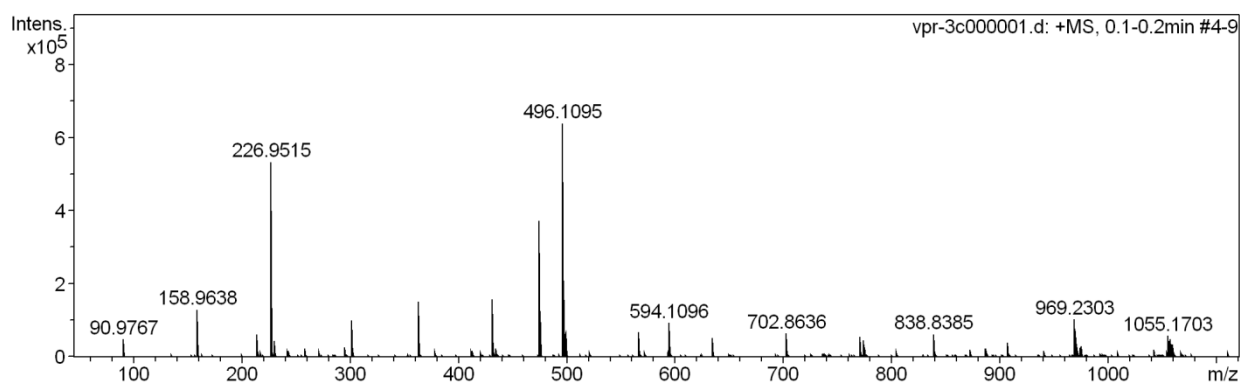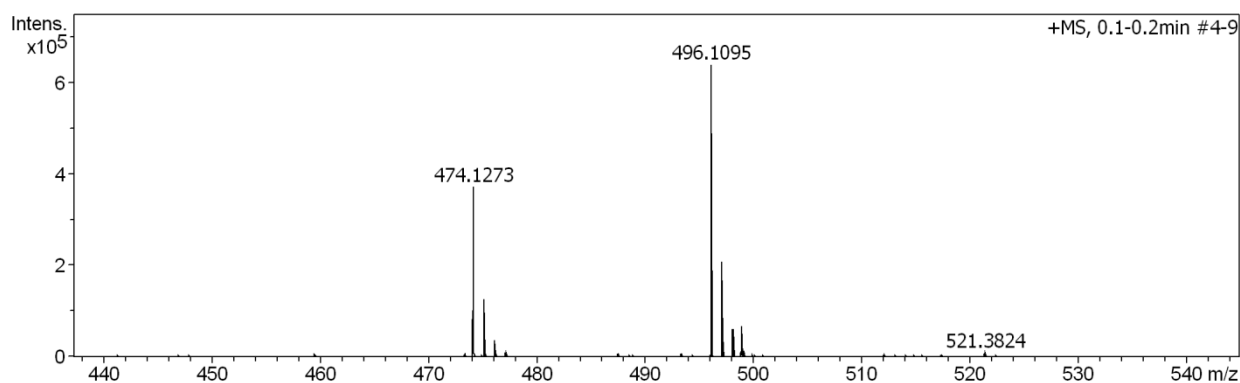

### Display Report

| Meas. m/z | # | Ion Formula                                                                    | m/z      | err [ppm] | mSigma | Score  | rdb  | e <sup>-</sup> Conf | N-Rule |
|-----------|---|--------------------------------------------------------------------------------|----------|-----------|--------|--------|------|---------------------|--------|
| 474.1273  | 1 | C <sub>29</sub> H <sub>20</sub> N <sub>3</sub> O <sub>2</sub> S                | 474.1271 | -0.6      | 4.1    | 100.00 | 21.5 | even                | ok     |
|           | 1 | C <sub>24</sub> H <sub>25</sub> N <sub>3</sub> NaO <sub>2</sub> S <sub>2</sub> | 474.1280 | 1.5       | 28.5   | 100.00 | 13.5 | even                | ok     |
| 496.1095  | 1 | C <sub>31</sub> H <sub>18</sub> N <sub>3</sub> O <sub>2</sub> S                | 496.1114 | 3.9       | 16.1   | 100.00 | 24.5 | even                | ok     |
|           | 1 | C <sub>29</sub> H <sub>19</sub> N <sub>3</sub> NaO <sub>2</sub> S              | 496.1090 | -0.9      | 7.0    | 100.00 | 21.5 | even                | ok     |

+MS, 0.1-0.2min #4-9
